# Supplementary material for: I2-Mediated 2H-indazole synthesis via halogen-bond-assisted benzyl C–H functionalization
Source: Royal Society of Chemistry journal article supplement (doi:10.1039/c6ob01827k), 2016-01-01
Supplement: c6ob01827k1.pdf [file c6ob01827k1.pdf]

Supporting Information

**I<sub>2</sub>-mediated 2*H*-indazole synthesis *via* halogen-bond-assisted  
benzyl C-H functionalization**

Xiangli Yi<sup>a</sup>, Lei Jiao<sup>b</sup>, Chanjuan Xi<sup>a,c\*</sup>

<sup>a</sup>Key Laboratory of Bioorganic Phosphorus Chemistry & Chemical Biology  
(Ministry of Education), Department of Chemistry, Tsinghua University, Beijing  
100084, China.

<sup>b</sup>Center of Basic Molecular Science (CBMS), Department of Chemistry, Tsinghua  
University, Beijing 100084, China.

<sup>c</sup>State Key Laboratory of Elemento-Organic Chemistry, Nankai University, Tianjin  
300071, China.

\*E-mail: [cjxi@tsinghua.edu.cn](mailto:cjxi@tsinghua.edu.cn).

**List of the contents:**

|                                                                               |     |
|-------------------------------------------------------------------------------|-----|
| 1. General Information.....                                                   | S3  |
| 2. Specific synthetic procedures and characterization data of substrates..... | S4  |
| 3. Mechanistic investigations.....                                            | S8  |
| 3.1. Characterization of halogen bond by Far-Infared spectroscopy.....        | S8  |
| 3.2. <sup>1</sup> H-NMR characterization of halogen bond.....                 | S8  |
| 3.3. EPR monitoring of reaction and signal simulation.....                    | S8  |
| 3.4. Determination of KIE value.....                                          | S8  |
| 3.5. DFT calculation of mechanism.....                                        | S9  |
| 4. Coordinates and Energies of Stationary Points.....                         | S11 |
| 5. Copies of <sup>1</sup> H and <sup>13</sup> C NMR Spectra.....              | S21 |
| References.....                                                               | S34 |

## 1. General Information

Chemicals used in this article were either purchased or synthesized according to reported procedures. Solvents such as toluene, CH<sub>3</sub>CN, 1,2-dichloroethane (DCE) and CHCl<sub>3</sub> were dried over activated 4Å molecular sieves and used directly. Gas Chromatography-Mass Spectrometer (GC-MS) was used for reaction monitoring and product analysis. <sup>1</sup>H NMR and <sup>13</sup>C NMR spectra were recorded on 400 MHz or 600 MHz NMR spectrometer to identify the structure of substrates and products. Chemical shifts (δ) were given in ppm, with solvent signal as reference. <sup>1</sup>H-NMR yields were obtained by adding trichloroethylene (9.00 μL, 0.080 mmol) to the crude product as the internal standard. All chemical yields are calculated based on azobenzenes **1**. Far infrared spectra was recorded on PerkinElmer FT-IR/ FIR spectrometer. Radical observation experiments were conducted on JEOL FA-200 EPR spectrometer.

## 2. Specific synthetic procedures and characterization data of substrates

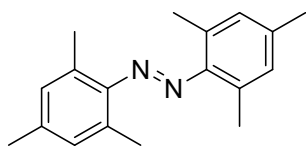

**1,2-Dimesityldiazene (1a):**<sup>1,2</sup> Synthesized *via* homocoupling of 2,4,6-trimethylaniline: 5 mmol 2,4,6-trimethylaniline was dissolved in 20 mL toluene in a flask.<sup>3</sup> Then, 0.3 mmol CuBr (43.2 mg) and 0.9 mmol pyridine (75  $\mu$ L) were added to the solution. The reaction mixture was vigorously stirred and heated at 60 °C open in the air for 24 h. The product was separated by column chromatography (red crystal, 62% isolated yield); <sup>1</sup>H NMR (400 MHz, CDCl<sub>3</sub>):  $\delta$  6.97 (s, 4H), 2.43 (s, 12H), 2.34 (s, 6H); <sup>13</sup>C NMR (100 MHz, CDCl<sub>3</sub>):  $\delta$  149.3, 138.5, 131.8, 130.2, 21.2, 20.2.

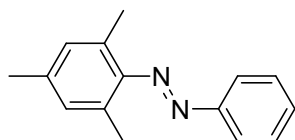

**1-Mesityl-2-phenyldiazene (1b):**<sup>1</sup> Synthesized *via* GP1 (red oil, 57% isolated yield); <sup>1</sup>H NMR (400 MHz, CDCl<sub>3</sub>):  $\delta$  7.91-7.88 (m, 2H), 7.57 – 7.45 (m, 3H), 6.96 (d,  $J$  = 0.6 Hz, 2H), 2.39 (s, 6H), 2.34 (s, 3H).; <sup>13</sup>C NMR (100 MHz, CDCl<sub>3</sub>):  $\delta$  153.1, 149.0, 138.5, 131.5, 130.8, 130.1, 129.2, 122.6, 21.2, 19.3.

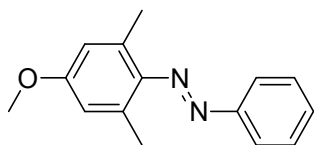

**1-(4-Methoxy-2,6-dimethylphenyl)-2-phenyldiazene (1c):** Synthesized *via* GP1 (red oil, 61% isolated yield); <sup>1</sup>H NMR (400 MHz, CDCl<sub>3</sub>):  $\delta$  7.90 – 7.85 (m, 2H), 7.55 – 7.48 (m, 2H), 7.48 – 7.41 (m, 1H), 6.68 (s, 2H), 3.85 (s, 3H), 2.50 (s, 6H); <sup>13</sup>C NMR (100 MHz, CDCl<sub>3</sub>):  $\delta$  159.7, 153.3, 144.7, 134.9, 130.4, 129.1, 122.4, 114.6, 55.5, 20.4. GC-MS: 240; HRMS (ESI positive mode) calcd for C<sub>18</sub>H<sub>18</sub>N<sub>2</sub>O<sub>2</sub>+H<sup>+</sup> 240.1263, found 240.1264.

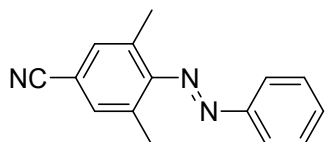

**3,5-Dimethyl-4-(phenyldiazenyl)benzonitrile (1d):** Synthesized *via* modified GP1 (100 °C, red crystal, 32%); M.p. 98-100 °C; <sup>1</sup>H NMR (400 MHz, CDCl<sub>3</sub>):  $\delta$  7.94 – 7.89 (m, 2H), 7.59 – 7.54 (m, 3H), 7.42 (s, 2H), 2.29 (s, 6H); <sup>13</sup>C NMR (100 MHz, CDCl<sub>3</sub>):

$\delta$  155.0, 152.5, 132.7, 132.3, 131.2, 129.4, 122.9, 119.0, 111.1, 18.3. GC-MS: 235; HRMS (ESI positive mode) calcd for  $C_{18}H_{18}N_2O_2+H^+$  235.1109, found 235.1111.

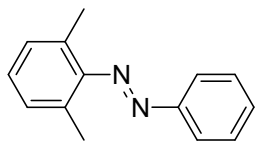

**1-(2,6-Dimethylphenyl)-2-phenyldiazene (1e):** <sup>1</sup> Synthesized via GP1 (orange oil, 48% isolated yield); <sup>1</sup>H NMR (400 MHz, CDCl<sub>3</sub>):  $\delta$  7.94 – 7.89 (m, 2H), 7.57 – 7.46 (m, 3H), 7.16 – 7.11 (m, 3H), 2.35 (s, 6H); <sup>13</sup>C NMR (100 MHz, CDCl<sub>3</sub>):  $\delta$  152.9, 151.6, 131.2, 130.7, 129.2, 128.2, 122.6, 18.9.

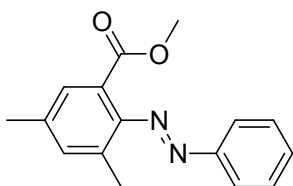

**Methyl 3,5-dimethyl-2-(phenyldiazenyl)benzoate (1f):** Synthesized *via* modified GP1 (60 °C, red oil, 59 %); <sup>1</sup>H NMR (400 MHz, CDCl<sub>3</sub>):  $\delta$  7.90 – 7.85 (m, 2H), 7.55 – 7.47 (m, 3H), 7.27 – 7.25 (m, 1H), 7.23 – 7.20 (m, 1H), 3.71 (s, 3H), 2.55 (s, 3H), 2.38 (s, 3H); <sup>13</sup>C NMR (100 MHz, CDCl<sub>3</sub>):  $\delta$  169.9, 152.5, 148.3, 139.6, 136.2, 134.0, 131.4, 129.2, 127.8, 123.6, 123.0, 52.1, 21.2, 18.0. GC-MS: 268; HRMS (ESI positive mode) calcd for  $C_{18}H_{18}N_2O_2+H^+$  268.1212, found 268.1215.

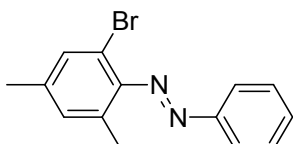

**1-(2-Bromo-4,6-dimethylphenyl)-2-phenyldiazene (1g):** Synthesized *via* modified GP1 (60 °C, red oil, 48%); <sup>1</sup>H NMR (400 MHz, CDCl<sub>3</sub>):  $\delta$  7.98 – 7.92 (m, 2H), 7.59 – 7.51 (m, 3H), 7.39 (s, 1H), 7.03 (s, 1H), 2.35 (s, 3H), 2.30 (s, 3H); <sup>13</sup>C NMR (100 MHz, CDCl<sub>3</sub>):  $\delta$  152.6, 148.1, 139.3, 131.8, 131.6, 131.1, 130.8, 129.3, 122.9, 118.3, 20.9, 19.3. GC-MS: 288; HRMS (ESI positive mode) calcd for  $C_{18}H_{18}N_2O_2+H^+$  288.0262, found 288.0261.

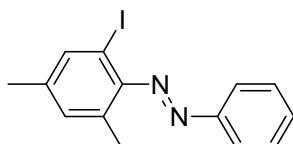

**1-(2-Iodo-4,6-dimethylphenyl)-2-phenyldiazene (1h):** Synthesized *via* modified GP1 (60 °C, red oil, 74 %); <sup>1</sup>H NMR (400 MHz, CDCl<sub>3</sub>):  $\delta$  8.00 – 7.94 (m, 2H), 7.70 – 7.68

(m, 1H), 7.58 – 7.50 (m, 3H), 7.06 (s, 1H), 2.33 (s, 3H), 2.32 (s, 3H);  $^{13}\text{C}$  NMR (100 MHz,  $\text{CDCl}_3$ ):  $\delta$  152.4, 149.6, 139.8, 138.1, 133.1, 131.6, 129.9, 129.3, 123.1, 95.0, 20.7, 19.5. GC-MS: 336; HRMS (ESI positive mode) calcd for  $\text{C}_{18}\text{H}_{18}\text{N}_2\text{O}_2+\text{H}^+$  336.0123, found 336.0125.

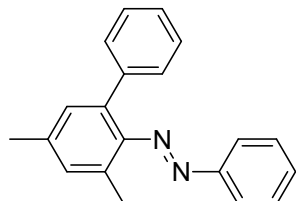

**1-(3,5-Dimethyl-[1,1'-biphenyl]-2-yl)-2-phenyldiazene (1i):** Synthesized *via* coupling of **1eq** with phenylboronic acid : A seal tube were charged with 0.6 mmol azobenzene, 0.7 mmol phenylboronic acid, 6 mmol  $\text{Na}_2\text{CO}_3$ , 0.03 mmol  $\text{Pd}(\text{PPh}_3)_4$ , 9 mL THF and 3 mL  $\text{H}_2\text{O}$ . The vessel was heated at 80 °C for 24 h. The product was separated by column chromatography (red oil, 80% isolated yield);  $^1\text{H}$  NMR (400 MHz,  $\text{CDCl}_3$ ):  $\delta$  7.70 – 7.65 (m, 2H), 7.49 – 7.44 (m, 3H), 7.37 – 7.29 (m, 5H), 7.19 (s, 1H), 7.16 (s, 1H), 2.45 (s, 6H);  $^{13}\text{C}$  NMR (100 MHz,  $\text{CDCl}_3$ ):  $\delta$  152.8, 148.5, 140.1, 138.2, 136.8, 131.8, 130.8, 130.5, 129.6, 129.6, 129.1, 127.7, 126.7, 122.6, 21.3, 19.5. GC-MS: 286; HRMS (ESI positive mode) calcd for  $\text{C}_{18}\text{H}_{18}\text{N}_2\text{O}_2+\text{H}^+$  286.1470, found 286.1473.

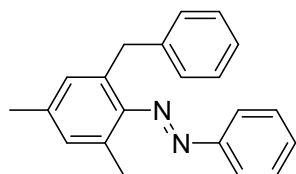

**1-(2-Benzyl-4,6-dimethylphenyl)-2-phenyldiazene (1j):** Synthesized *via* coupling of **1g** with benzylmagnesium chloride<sup>3</sup>: A seal tube were charged with 0.05 mmol  $\text{Pd}(\text{PPh}_3)_2\text{Cl}_2$  and 1.5 mL THF under  $\text{N}_2$  atmosphere. Then, 100  $\mu\text{L}$  DIBAL solution ( $(i\text{-Bn})_2\text{AlH}$  in hexane, 1M) was added to the reaction which was latter stirred for 5 min at room temperature till the mixture turned deep brown. 0.5 mmol **1g** and 0.55 mL benzylmagnesium chloride (1.4 M in THF) were in turn added to the reaction solution which was subsequently stirred for 6 h at room temperature. The product was separated by column chromatography (yellow oil, 40% isolated yield);  $^1\text{H}$  NMR (400 MHz,  $\text{CDCl}_3$ ):  $\delta$  7.83 – 7.78 (m, 2H), 7.54 – 7.44 (m, 3H), 7.24 – 7.12 (m, 5H), 6.99 (s, 1H), 6.96 (s, 1H), 4.19 (s, 2H), 2.38 (s, 3H), 2.33 (s, 3H);  $^{13}\text{C}$  NMR (100 MHz,  $\text{CDCl}_3$ ):  $\delta$  153.0, 148.7, 141.5, 138.7, 135.7, 131.0, 130.9, 130.2, 129.7, 129.1, 129.0, 128.4, 125.9, 122.6, 37.9, 21.3, 19.8. GC-MS: 300; HRMS (ESI positive mode) calcd for  $\text{C}_{18}\text{H}_{18}\text{N}_2\text{O}_2+\text{H}^+$  300.1626, found 300.1624.

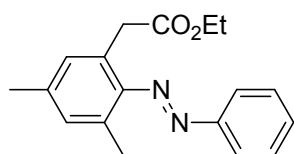

**Ethyl 2-(3,5-dimethyl-2-(phenyldiazenyl)phenyl)acetate (1k):** Synthesized *via* coupling of **1g** with (2-ethoxy-2-oxoethyl)zinc(II) bromide<sup>4</sup>: 0.55 mmol ethyl bromoacetate (61  $\mu$ L) reacted with 0.75 mmol Zn (49 mg) in 1 mL THF under N<sub>2</sub> atmosphere in schlenk tube A at room temperature for 10 min. A second schlenk tube (B) was charged with 5.8 mg Pd(dba)<sub>2</sub> and 26  $\mu$ L P(<sup>t</sup>Bu)<sub>3</sub> solution (10% in hexane), 0.5 mmol **1g** (140 mg) and 2 mL THF under N<sub>2</sub> atmosphere, and the mixture was stirred for 5 min. The solution in tube B was transferred into tube A. The reaction was heated at 66 °C for 12 h. The product was separated by column chromatography. (orange solid, 21% isolated yield); M.p. 57-59 °C; <sup>1</sup>H NMR (400 MHz, CDCl<sub>3</sub>):  $\delta$  7.86 (dd,  $J$  = 8.1, 1.1 Hz, 2H), 7.54 – 7.41 (m, 3H), 7.08 (s, 1H), 6.97 (s, 1H), 4.10 (q,  $J$  = 7.1 Hz, 2H), 3.79 (s, 2H), 2.53 (s, 3H), 2.37 (s, 3H), 1.17 (t,  $J$  = 7.1 Hz, 3H); <sup>13</sup>C NMR (100 MHz, CDCl<sub>3</sub>):  $\delta$  172.0, 153.1, 147.5, 139.8, 134.4, 132.0, 131.0, 130.8, 129.1, 128.0, 122.6, 60.8, 40.1, 21.4, 19.7, 14.3. GC-MS: 296; HRMS (ESI positive mode) calcd for C<sub>18</sub>H<sub>18</sub>N<sub>2</sub>O<sub>2</sub>+H<sup>+</sup> 296.1525, found 296.1525.

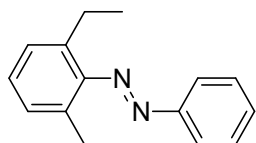

**1-(2-Ethyl-6-methylphenyl)-2-phenyldiazene (1l):**<sup>1</sup> Synthesized *via* GP1 (orange oil, 65% isolated yield); <sup>1</sup>H NMR (400 MHz, CDCl<sub>3</sub>):  $\delta$  7.96 – 7.90 (m, 2H), 7.58 – 7.49 (m, 3H), 7.23 – 7.12 (m, 3H), 2.75 (q,  $J$  = 7.5 Hz, 2H), 2.33 (s, 3H), 1.19 (t,  $J$  = 7.5 Hz, 3H); <sup>13</sup>C NMR (100 MHz, CDCl<sub>3</sub>):  $\delta$  152.9, 151.4, 137.6, 131.2, 129.5, 129.3, 129.3, 128.3, 127.6, 122.7, 25.2, 19.1, 15.8.

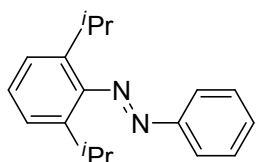

**1-(2,6-Diisopropylphenyl)-2-phenyldiazene (1o):**<sup>1</sup> Synthesized *via* GP1 (orange oil, 33% isolated yield); <sup>1</sup>H NMR (400 MHz, CDCl<sub>3</sub>):  $\delta$  7.95 – 7.90 (m, 2H), 7.59 – 7.52 (m, 3H), 7.31 – 7.24 (m, 3H), 3.06 (hept,  $J$  = 6.9 Hz, 2H), 1.20 (d,  $J$  = 6.9 Hz, 12H); <sup>13</sup>C NMR (100 MHz, CDCl<sub>3</sub>):  $\delta$  152.7, 151.3, 139.5, 131.4, 129.3, 127.9, 123.7, 122.8, 27.9, 23.7.





### 3. Mechanistic investigations

#### 3.1. Characterization of halogen bond by far infrared spectroscopy<sup>5</sup>

Solution A (0.1 mol/L of **1c** in cyclohexane) and solution B (0.1 mol/L of **1c** and 0.1 mol/L of I<sub>2</sub> in cyclohexane) was respectively prepared. The sample solution was filled in a polyethylene cell (optic path: 4 mm) for measurement. The far infrared spectra (400 cm<sup>-1</sup> ~ 100 cm<sup>-1</sup>) were recorded on PerkinElmer FT-IR/ FIR spectrometer for both solution A and B.

#### 3.2. <sup>1</sup>H-NMR characterization of halogen bond

Solution C (0.05 mol/L **1b** in CDCl<sub>3</sub>) and solution D (0.05 mol/L **1b** and 0.05 mol/L I<sub>2</sub> in CDCl<sub>3</sub>) was respectively prepared. <sup>1</sup>H-NMR spectra were recorded for both solution.

#### 3.3. EPR monitoring of reaction and signal simulation

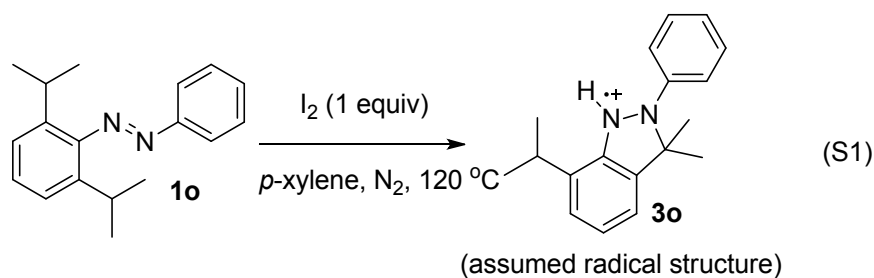

0.05 mmol of **1o** (13.3 mg) and 0.05 mmol of I<sub>2</sub> (12.7 mg) were dissolved in 1 mL of *p*-xylene in a EPR tube under N<sub>2</sub> atmosphere. The sample tube was placed in the detecting chamber of JEOL FA-200 EPR spectrometer (9.45 GHz) and then heated to 120 °C. The EPR signal was collected every 2 minutes.

The obtained signal at 18 min was simulated using JEOL IsoSimu (Version 2.2.0) mainly considering the coupling of the two N (nuclear spin= 1) and one H (nuclear spin= 1/2) with the single electron. When the parameters were properly adjusted: signal center= 324.72 mT, A<sub>iso</sub>(N1)= 0.63 mT, A<sub>iso</sub>(N2)= 0.52 mT, A<sub>iso</sub>(H)= 0.395 mT, line width= 0.46 mT, the experimental signal could be well simulated.

#### 3.4. Determination of KIE value

**1b-d<sub>3</sub>** was synthesized following the procedure in Scheme S1.<sup>6</sup>

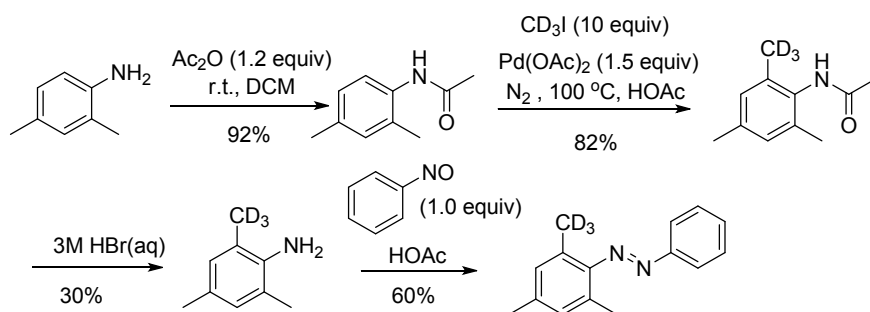

**Scheme S1** Synthetic procedure for **1b-d<sub>3</sub>**.

**1b-d<sub>3</sub>** reacted with I<sub>2</sub> according to GP2, and the <sup>1</sup>H-NMR of the product is displayed in Figure S3.

$$S(\delta=2.410) : S(\delta=2.671) = \mathbf{2b-d_1} : (\mathbf{2b-d_1} + \mathbf{2b-d_3}) = 0.10 : 1.00;$$

$$\text{Thus, } \mathbf{2b-d_3} / \mathbf{2b-d_1} = (1.00 - 0.10) / 0.10 = 9.0;$$

$$\text{KIE} = k(\mathbf{2b-d_3}) / k(\mathbf{2b-d_1}) = \mathbf{2b-d_3} / \mathbf{2b-d_1} = 9.0.$$

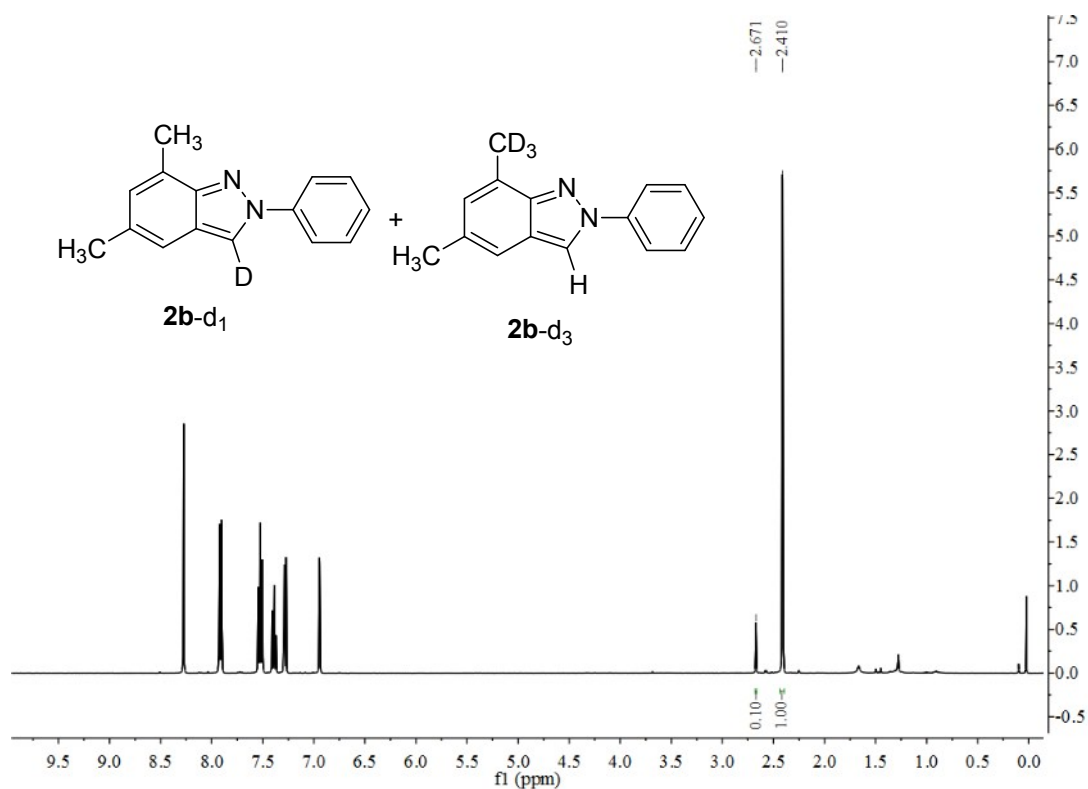

**Figure S1** <sup>1</sup>H-NMR of the products from **1b-d<sub>3</sub>**

### 3.5. DFT calculation of mechanism

DFT calculations were performed with Gaussian 09 program using M06-2X functional.<sup>7</sup> The SDD basis set was used for iodine and the 6-31+g(d) basis set for the other atoms (keyword 5D was used in the calculations) during the geometry

optimization. The vibrational frequencies were calculated using the same basis set to obtain the thermal correction to Gibbs Free Energy. The single-point energies and solvent effects in DCE were calculated using 6-311+g(d,p)[SDD for I] based on the corresponding optimized structures. Solvation energies were evaluated by a self-consistent reaction field (SCRF) using the CPCM approach, where UFF radii were used to define the atomic radii.

The combination of iodine radical to azo group is thermodynamically favored with a  $\Delta_r G_{\text{sol}} = -4.7$  kcal/mol (eq. S2). The N-I distance is 2.76 Å and the Mulliken spin density for I is 0.78 in the optimized structure. Both parameters are consistent with the chemical structure of **5e** shown in eq. S2.

The transition states of hydrogen abstraction for four possible cases (Scheme S2) were calculated. All these transition states involve the transfer of hydrogen to nitrogen. Among them, transformation from **5e** to **TS-1do** represents the lowest energy barrier, and thus well corroborate the mechanism in Scheme 2.

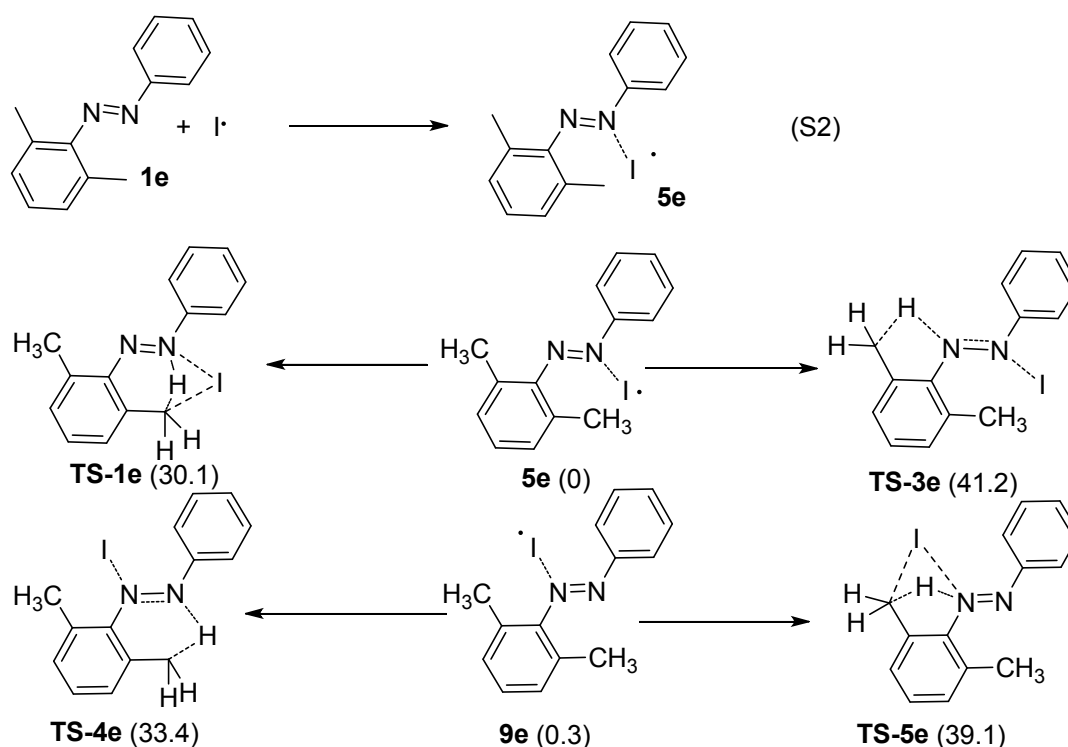

**Scheme S2** Transition states calculation for four possible hydrogen abstraction process in the reaction of **1e**. The Gibbs free energies in solution ( $\Delta G_{\text{sol}}$ , in kcal/mol) are given in parentheses.

#### 4. Coordinates and Energies of Stationary Point

**I<sub>2</sub>** H 0.50066400 -2.25960900 1.21958300

$G_{\text{sol}} = -22.756315$  Hartree H 0.76008800 -2.79078900 -0.43013600

I 0.00000000 0.00000000 1.40937700 I H 1.93276900 -3.23770000 0.82926700

0.00000000 0.00000000 -1.40937700 C 1.73662100 2.59800700 -0.25801900

**I•** H 1.08575800 2.66957800 -1.13505600

$G_{\text{sol}} = -11.356971$  Hartree H 1.12035800 2.83304400 0.61484600

**HI** H 2.52046000 3.35465700 -0.34923500

$G_{\text{sol}} = -11.975611$  Hartree N 0.14843400 0.38571900 0.15007400

I 0.00000000 0.00000000 0.03033900 N -0.62966100 -0.50955500 -0.22730000

H 0.00000000 0.00000000 -1.60795200 C -2.01285200 -0.18028900 -0.09424000

C -2.90312700 -1.11663000 -0.62093800

C -2.48985700 0.98451700 0.51860600

C -4.27591500 -0.89015500 -0.54745000

$G_{\text{sol}} = -651.067553$  Hartree H -2.49916300 -2.01143300 -1.08564300

C 3.72702300 1.05445200 -0.22861600 C -3.86004400 1.20284000 0.59064900

C 2.34789100 1.22473100 -0.13579500 H -1.78091200 1.69661200 0.92718500

C 1.53365300 0.08922100 0.05132300 C -4.75518700 0.26935200 0.05817300

C 2.08809900 -1.20120500 0.19294300 H -4.96898700 -1.61698200 -0.95993000

C 3.47890900 -1.31705800 0.11638500 H -4.23785100 2.10417600 1.06456200

C 4.29348900 -0.21138600 -0.10419400 H -5.82456200 0.44869600 0.11979600

H 4.36018700 1.92282400 -0.39126100

H 3.92673900 -2.30017500 0.23791000

H 5.37090900 -0.33515400 -0.16550300

C 1.27498700 -2.44154400 0.46854000

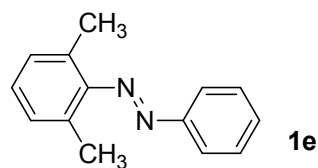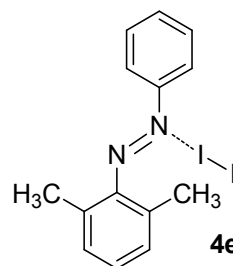

|                                        |             |             |             |                                                                                     |             |             |             |
|----------------------------------------|-------------|-------------|-------------|-------------------------------------------------------------------------------------|-------------|-------------|-------------|
| $G_{\text{sol}} = -673.828496$ Hartree |             |             | C           | -4.73158800                                                                         | -2.29837600 | -0.78985100 |             |
| C                                      | -0.40688700 | 4.05174300  | -0.92522700 | H                                                                                   | -4.23726200 | -0.23676400 | -1.22017300 |
| C                                      | -1.24079600 | 2.94776400  | -1.09139000 | C                                                                                   | -4.34490200 | -3.46241600 | -0.11875900 |
| C                                      | -1.51380100 | 2.15648900  | 0.03372100  | H                                                                                   | -2.86781700 | -4.38563100 | 1.14976000  |
| C                                      | -1.03047100 | 2.46447100  | 1.31581000  | H                                                                                   | -5.64434600 | -2.28909400 | -1.37761000 |
| C                                      | -0.22332000 | 3.59681000  | 1.43765500  | H                                                                                   | -4.96126800 | -4.35407100 | -0.18302500 |
| C                                      | 0.10092400  | 4.37561300  | 0.33040100  | I                                                                                   | 0.78524900  | -0.47673600 | 0.09868400  |
| H                                      | -0.15831400 | 4.66231600  | -1.78921400 | I                                                                                   | 3.58634400  | -0.99801900 | -0.22478500 |
| H                                      | 0.15765900  | 3.86551400  | 2.41951700  | 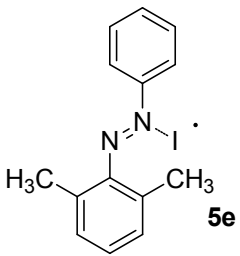 |             |             |             |
| H                                      | 0.74241700  | 5.24386600  | 0.44832400  |                                                                                     |             |             |             |
| C                                      | -1.38328300 | 1.64824600  | 2.53582400  |                                                                                     |             |             |             |
| H                                      | -2.43177700 | 1.33461700  | 2.52519300  |                                                                                     |             |             |             |
| H                                      | -0.77069300 | 0.74318300  | 2.60460700  |                                                                                     |             |             |             |
| H                                      | -1.21248700 | 2.23880800  | 3.43973000  |                                                                                     |             |             |             |
| C                                      | -1.79119600 | 2.56682700  | -2.44060100 |                                                                                     |             |             |             |
| H                                      | -1.33742500 | 1.63753600  | -2.80369200 |                                                                                     |             |             |             |
| H                                      | -2.87296500 | 2.40323700  | -2.39183000 |                                                                                     |             |             |             |
| H                                      | -1.58975100 | 3.35093800  | -3.17461800 |                                                                                     |             |             |             |
| $G_{\text{sol}} = -662.431947$ Hartree |             |             | C           | 3.66666600                                                                          | 1.40782500  | -0.71696600 |             |
| C                                      | 2.29297300  | 1.62129100  | -0.79825900 | C                                                                                   | 1.48872500  | 1.14827100  | 0.25136300  |
| C                                      | 2.01947300  | 0.52347600  | 1.39334000  | C                                                                                   | 3.40533000  | 0.35782200  | 1.44066500  |
| C                                      | 4.22146400  | 0.77941900  | 0.39565200  | C                                                                                   | 4.22146400  | 0.77941900  | 0.39565200  |
| H                                      | 4.30441300  | 1.74171300  | -1.53100900 | H                                                                                   | 4.30441300  | 1.74171300  | -1.53100900 |
| H                                      | 3.84603200  | -0.11220600 | 2.31596100  | H                                                                                   | 3.84603200  | -0.11220600 | 2.31596100  |
| H                                      | 5.29536600  | 0.62851400  | 0.45376500  | H                                                                                   | 5.29536600  | 0.62851400  | 0.45376500  |
| C                                      | 1.16894600  | 0.07801000  | 2.55674500  | C                                                                                   | 1.16894600  | 0.07801000  | 2.55674500  |
| H                                      | 0.35388200  | 0.77961300  | 2.75879000  | H                                                                                   | 0.35388200  | 0.77961300  | 2.75879000  |
| H                                      | 0.71931600  | -0.90122000 | 2.36442900  | H                                                                                   | 0.71931600  | -0.90122000 | 2.36442900  |

|   |             |             |             |   |             |             |             |
|---|-------------|-------------|-------------|---|-------------|-------------|-------------|
| H | 1.78462500  | 0.00060000  | 3.45695700  | C | 2.98399400  | 2.93403000  | -0.32942200 |
| C | 1.66817700  | 2.28864800  | -1.99543300 | C | 1.60046500  | 2.86999700  | -0.25802800 |
| H | 1.03524600  | 1.58779700  | -2.55092800 | C | 0.97543000  | 1.65374600  | 0.13431300  |
| H | 1.03483000  | 3.12873300  | -1.69164700 | C | 1.78393400  | 0.55198200  | 0.52975600  |
| H | 2.44017400  | 2.66125900  | -2.67333500 | C | 3.17803300  | 0.66684700  | 0.43638900  |
| N | 0.09758500  | 1.41026200  | 0.12227000  | C | 3.78263700  | 1.83335200  | -0.00109300 |
| N | -0.66039800 | 0.45838300  | 0.32404900  | H | 3.44987200  | 3.86165600  | -0.65277800 |
| C | -2.06432200 | 0.70723000  | 0.23548300  | H | 3.78749600  | -0.18416600 | 0.73348400  |
| C | -2.90165300 | -0.31184800 | 0.68532400  | H | 4.86393200  | 1.90018300  | -0.06630500 |
| C | -2.58590800 | 1.90316900  | -0.26858200 | C | 1.24793200  | -0.66584300 | 1.19437100  |
| C | -4.28206000 | -0.13149600 | 0.64093900  | H | 0.25517600  | -0.54734200 | 1.62224300  |
| H | -2.46084200 | -1.23106900 | 1.05915700  | H | 1.93912100  | -1.04506000 | 1.94421200  |
| C | -3.96428200 | 2.06775700  | -0.31760500 | C | 0.74894900  | 4.05719000  | -0.62020800 |
| H | -1.90870300 | 2.67652300  | -0.61495200 | H | 0.10918100  | 3.83665800  | -1.48063900 |
| C | -4.81294100 | 1.05466800  | 0.13823400  | H | 0.08258200  | 4.32576800  | 0.20564600  |
| H | -4.94052400 | -0.91951600 | 0.99224200  | H | 1.37650700  | 4.91892500  | -0.86231700 |
| H | -4.38174800 | 2.98818700  | -0.71425200 | N | -0.40819100 | 1.69996600  | 0.14967200  |
| H | -5.88929300 | 1.19196700  | 0.09571100  | N | -1.02761600 | 0.56099800  | -0.11310200 |
| I | 0.12798900  | -2.04277100 | -0.54133100 | C | -2.41772400 | 0.45615500  | -0.04445900 |
|   |             |             |             | C | -3.01573300 | -0.74816000 | -0.43741700 |
|   |             |             |             | C | -3.20088200 | 1.51983700  | 0.41744800  |
|   |             |             |             | C | -4.39727100 | -0.88269000 | -0.37029800 |
|   |             |             |             | H | -2.39529400 | -1.57042300 | -0.78681300 |
|   |             |             |             | C | -4.58256500 | 1.36688200  | 0.47444300  |
|   |             |             |             | H | -2.71771400 | 2.44200800  | 0.71845100  |

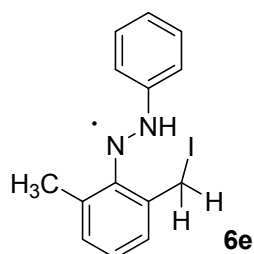

$G_{\text{sol}} = -662.435388$  Hartree

|   |             |             |             |   |             |             |             |
|---|-------------|-------------|-------------|---|-------------|-------------|-------------|
| C | -5.18943600 | 0.17255100  | 0.08444800  | H | -1.30557600 | -2.95578100 | 0.80647900  |
| H | -4.85650800 | -1.81816200 | -0.67570400 | C | -4.44485800 | -1.94136000 | -0.05557700 |
| H | -5.19195300 | 2.19335800  | 0.82836200  | H | -4.92480200 | -0.02431800 | -0.91762900 |
| H | -6.26816300 | 0.06414900  | 0.13479400  | H | -3.66992200 | -3.74903700 | 0.82477000  |
| H | -0.52408200 | -0.20801400 | -0.55763000 | H | -5.47542600 | -2.28230400 | -0.04143600 |
| I | 1.04064000  | -2.42852000 | -0.16268800 | C | 0.15696700  | -0.55895900 | -1.53737700 |

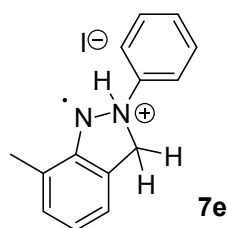

$G_{\text{sol}} = -662.446408$  Hartree

|   |             |             |             |
|---|-------------|-------------|-------------|
| C | 1.65160000  | -1.16743600 | 0.14893600  |
| C | 1.60287600  | -0.73307200 | -1.20126600 |
| C | 2.75450000  | -0.59715800 | -1.94427000 |
| C | 3.97040400  | -0.90756700 | -1.31872400 |
| C | 4.02024900  | -1.34823600 | 0.01392400  |
| C | 2.87645900  | -1.49369500 | 0.78669000  |
| H | 2.73065800  | -0.25867400 | -2.97509500 |
| H | 4.89710400  | -0.80252100 | -1.87412500 |
| H | 4.98641400  | -1.56808800 | 0.46029400  |
| C | -1.82254900 | -1.07298400 | -0.08627800 |
| C | -2.81829400 | -0.22773300 | -0.56722600 |
| C | -2.10608100 | -2.33555200 | 0.41908300  |
| C | -4.13711700 | -0.67529700 | -0.55204400 |
| H | -2.56593500 | 0.76881300  | -0.92118200 |
| C | -3.43163300 | -2.76626700 | 0.42997600  |

|   |             |             |             |
|---|-------------|-------------|-------------|
| C | 2.89115100  | -1.92494500 | 2.22191200  |
| H | 2.25896000  | -2.80649700 | 2.37177800  |
| N | -0.44629200 | -0.59388100 | -0.15275500 |
| N | 0.44617800  | -1.23420400 | 0.74673800  |
| H | 2.48907500  | -1.13207500 | 2.86152200  |
| H | 3.90689400  | -2.16036000 | 2.54807800  |
| H | -0.09941800 | 0.39576100  | -2.00506300 |
| H | -0.43421400 | 0.52131900  | 0.15316000  |
| H | -0.25511400 | -1.39759900 | -2.10912700 |
| I | -0.17962100 | 2.58018000  | 0.30402200  |

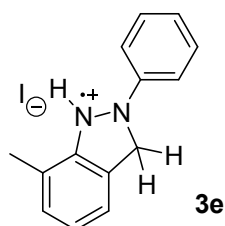

$G_{\text{sol}} = -662.466554$  Hartree

|   |            |             |             |
|---|------------|-------------|-------------|
| C | 1.81379600 | -0.74327700 | 0.35532400  |
| C | 1.91036600 | -1.91105000 | -0.39953900 |
| C | 3.14912100 | -2.39443400 | -0.78773800 |
| C | 4.27710200 | -1.66884200 | -0.39623000 |
| C | 4.15716300 | -0.49716200 | 0.35758600  |

|   |             |             |             |                                                                                    |             |             |             |
|---|-------------|-------------|-------------|------------------------------------------------------------------------------------|-------------|-------------|-------------|
| C | 2.91839200  | 0.00862800  | 0.75947000  | H                                                                                  | 3.70663900  | 1.54281600  | 2.03804000  |
| H | 3.24491700  | -3.30083600 | -1.37778500 | I                                                                                  | -0.47499400 | 2.41531200  | -0.48399800 |
| H | 5.26404100  | -2.01913500 | -0.68139600 | 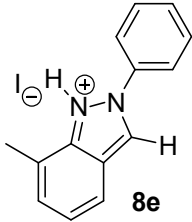 |             |             |             |
| H | 5.05507600  | 0.04306200  | 0.64563900  |                                                                                    |             |             |             |
| H | 0.10883900  | 0.56102400  | 0.44999100  |                                                                                    |             |             |             |
| C | -1.66401300 | -1.43440300 | 0.21531700  |                                                                                    |             |             |             |
| C | -2.41955000 | -2.34875000 | -0.53506500 |                                                                                    |             |             |             |
| C | -2.29746100 | -0.52898600 | 1.08033300  | $G_{\text{sol}} = -661.905511$ Hartree                                             |             |             |             |
| C | -3.80340000 | -2.34636000 | -0.42023300 | C                                                                                  | 2.08610000  | -0.27107900 | 0.11519000  |
| H | -1.93487500 | -3.04391100 | -1.21262100 | C                                                                                  | 2.49444900  | -1.61821800 | -0.05884700 |
| C | -3.68313800 | -0.53848600 | 1.17237000  | C                                                                                  | 3.87130600  | -1.93885200 | -0.15664600 |
| H | -1.71276100 | 0.16757600  | 1.67021900  | C                                                                                  | 4.76055400  | -0.89810900 | -0.08833900 |
| C | -4.44214200 | -1.44162300 | 0.42841600  | C                                                                                  | 4.32453900  | 0.45017700  | 0.07625100  |
| H | -4.38626400 | -3.05014300 | -1.00606600 | C                                                                                  | 3.00024200  | 0.81203400  | 0.18120000  |
| H | -4.17062800 | 0.17079200  | 1.83337300  | H                                                                                  | 4.20032500  | -2.96504700 | -0.28124100 |
| H | -5.52430800 | -1.44047600 | 0.50840700  | H                                                                                  | 5.82578300  | -1.09350200 | -0.15951400 |
| C | 0.51680500  | -2.40486300 | -0.66014800 | H                                                                                  | 5.07722500  | 1.23303700  | 0.12375500  |
| C | 2.76337600  | 1.27116400  | 1.55722200  | H                                                                                  | 0.04152900  | 0.59511600  | 0.09361600  |
| H | 1.99562500  | 1.15638700  | 2.32967300  | C                                                                                  | -1.11225200 | -1.80847200 | 0.11898400  |
| N | -0.28068700 | -1.42827900 | 0.08720200  | C                                                                                  | -1.62191200 | -2.73236600 | -0.79002300 |
| N | 0.47162700  | -0.46331000 | 0.65286700  | C                                                                                  | -1.91499300 | -1.17447700 | 1.06128400  |
| H | 0.32048800  | -3.41286000 | -0.27553600 | C                                                                                  | -2.97674000 | -3.04364200 | -0.73615800 |
| H | 0.24737300  | -2.37226100 | -1.72515500 | H                                                                                  | -0.97649400 | -3.17184500 | -1.54474700 |
| H | 2.44539800  | 2.09823100  | 0.91210300  | C                                                                                  | -3.27148400 | -1.48430100 | 1.08908700  |
|   |             |             |             | H                                                                                  | -1.49498100 | -0.44108800 | 1.74154500  |
|   |             |             |             | C                                                                                  | -3.79996500 | -2.41875200 | 0.20036800  |
|   |             |             |             | H                                                                                  | -3.39115600 | -3.75553400 | -1.44241900 |



|   |             |             |             |   |             |             |             |
|---|-------------|-------------|-------------|---|-------------|-------------|-------------|
| H | -3.91470400 | -0.98004700 | 1.80231700  | H | 1.22778000  | -1.27386000 | -2.21622400 |
| H | -4.86000100 | -2.65053200 | 0.22699500  | H | 1.12469300  | 0.27729200  | -3.05458000 |
| C | 1.30358100  | -2.35937900 | -0.07642000 | H | 2.57615800  | -0.72417300 | -3.23357200 |
| C | 2.52279800  | 2.22438700  | 0.34861000  | C | 1.32616900  | 1.77469300  | 2.03441100  |
| H | 1.86559500  | 2.32120800  | 1.22000200  | H | 0.81722900  | 2.72273200  | 1.83666000  |
| N | 0.28684300  | -1.50491100 | 0.06978900  | H | 0.55659000  | 1.02620000  | 2.25359800  |
| N | 0.73617500  | -0.24541500 | 0.20918700  | H | 1.94876200  | 1.89617900  | 2.92480600  |
| H | 1.93085100  | 2.54714800  | -0.51488100 | N | 0.24238300  | 0.51176400  | -0.40597400 |
| H | 3.37070300  | 2.90315400  | 0.46902800  | N | -0.51491000 | 1.45852600  | -0.17052400 |
| I | -1.39525400 | 2.23958100  | -0.21229100 | C | -1.90793900 | 1.21397000  | -0.29098800 |
| H | 1.11534000  | -3.42128800 | -0.14310700 | C | -2.73925300 | 2.08833200  | 0.41084300  |

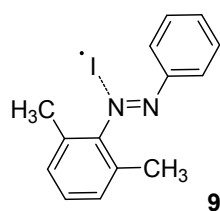

$G_{\text{sol}} = -662.431454$  Hartree

|   |            |             |             |   |             |             |             |
|---|------------|-------------|-------------|---|-------------|-------------|-------------|
| C | 3.56867400 | 1.50032800  | 0.91633500  | H | -1.77867000 | -0.44631000 | -1.65954600 |
| C | 2.18075100 | 1.35207300  | 0.86663200  | C | -4.65876400 | 0.89939800  | -0.43268100 |
| C | 1.64516100 | 0.75121000  | -0.28321400 | H | -4.77104200 | 2.58183900  | 0.91107800  |
| C | 2.43828400 | 0.27565100  | -1.33720000 | H | -4.24725500 | -0.72996700 | -1.78307300 |
| C | 3.81625500 | 0.46509600  | -1.25013400 | H | -5.73578500 | 0.77214100  | -0.48810400 |
| C | 4.37952600 | 1.07438200  | -0.13159400 | I | -0.19426600 | -1.98190000 | 0.59308600  |
| H | 4.01562100 | 1.94959600  | 1.79933400  |   |             |             |             |
| H | 4.45043400 | 0.12166800  | -2.06295800 |   |             |             |             |
| H | 5.45599600 | 1.20394000  | -0.06928900 |   |             |             |             |
| C | 1.80796500 | -0.39794000 | -2.52794100 |   |             |             |             |

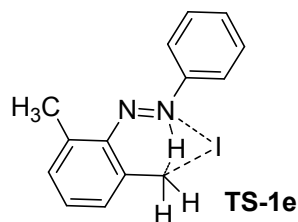

$G_{\text{sol}} = -662.3840083$  Hartree

|   |             |             |             |                                                                                                                                   |             |             |             |                                        |             |            |             |
|---|-------------|-------------|-------------|-----------------------------------------------------------------------------------------------------------------------------------|-------------|-------------|-------------|----------------------------------------|-------------|------------|-------------|
| C | 4.04812500  | 1.48595200  | -0.39891300 | C                                                                                                                                 | -4.48178900 | 1.82924400  | -0.03621300 |                                        |             |            |             |
| C | 2.75248400  | 1.96927300  | -0.33717100 | H                                                                                                                                 | -4.88024100 | -0.01600100 | 1.00506800  |                                        |             |            |             |
| C | 1.76758900  | 1.16751000  | 0.29801700  | H                                                                                                                                 | -3.78170600 | 3.60502400  | -1.03841900 |                                        |             |            |             |
| C | 2.09357900  | -0.07801900 | 0.90551900  | H                                                                                                                                 | -5.53074600 | 2.05912500  | -0.19639400 |                                        |             |            |             |
| C | 3.40625300  | -0.55663600 | 0.73827600  | I                                                                                                                                 | -0.43883000 | -2.44359100 | -0.48600200 |                                        |             |            |             |
| C | 4.36672200  | 0.21862800  | 0.11499000  | H                                                                                                                                 | -0.02813200 | -0.30029300 | 0.98340300  |                                        |             |            |             |
| H | 4.81882000  | 2.08327000  | -0.87777900 | 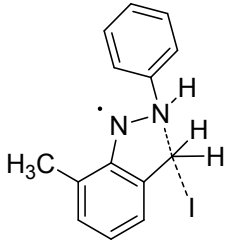 <p style="text-align: right;"><b>TS-2e</b></p> |             |             |             |                                        |             |            |             |
| H | 3.65942300  | -1.53313700 | 1.14108200  |                                                                                                                                   |             |             |             |                                        |             |            |             |
| H | 5.38288700  | -0.15469000 | 0.02564800  |                                                                                                                                   |             |             |             |                                        |             |            |             |
| C | 1.08701900  | -0.87277500 | 1.60275000  |                                                                                                                                   |             |             |             |                                        |             |            |             |
| H | 0.66338900  | -0.41725200 | 2.50706900  |                                                                                                                                   |             |             |             | $G_{\text{sol}} = -662.600291$ Hartree |             |            |             |
| H | 1.38125800  | -1.90262200 | 1.78873100  |                                                                                                                                   |             |             |             | C                                      | -1.85362000 | 3.68634400 | -0.09439400 |
| C | 2.38280700  | 3.29304900  | -0.95160900 |                                                                                                                                   |             |             |             | C                                      | -0.48397700 | 3.48266600 | -0.13328900 |
| H | 1.65197400  | 3.16005600  | -1.75502800 |                                                                                                                                   |             |             |             | C                                      | -0.01688700 | 2.15980800 | 0.11573100  |
| H | 1.93136100  | 3.96294400  | -0.21370800 |                                                                                                                                   |             |             |             | -0.91996300                            | 1.06404600  | 0.31875900 | C -         |
| H | 3.27031600  | 3.77879100  | -1.36443000 |                                                                                                                                   |             |             |             | 2.27843800                             | 1.31817600  | 0.34932300 | C -         |
| N | 0.46191300  | 1.60407100  | 0.12626700  | 2.73676900                                                                                                                        | 2.62921800  | 0.16025500  | H -         |                                        |             |            |             |
| N | -0.45031900 | 0.90432600  | 0.63551400  | 2.24638600                                                                                                                        | 4.68590500  | -0.26064000 | H -         |                                        |             |            |             |
| C | -1.79919800 | 1.24433800  | 0.36442800  | 2.97748400                                                                                                                        | 0.49974900  | 0.47808400  | H -         |                                        |             |            |             |
| C | -2.77476600 | 0.36951000  | 0.84616200  | 3.80507400                                                                                                                        | 2.82022500  | 0.18385600  | C -         |                                        |             |            |             |
| C | -2.15167100 | 2.41300000  | -0.31785100 | 0.22448800                                                                                                                        | -0.25753400 | 0.39001900  | H -         |                                        |             |            |             |
| C | -4.11877900 | 0.66573700  | 0.64004900  | 0.21553900                                                                                                                        | -0.86854200 | 1.28183800  | H           |                                        |             |            |             |
| H | -2.47513600 | -0.53997900 | 1.35875000  | 0.14089000                                                                                                                        | -0.71518400 | -0.52280300 | C           |                                        |             |            |             |
| C | -3.49706900 | 2.69953600  | -0.51130000 | 0.49982900                                                                                                                        | 4.58805100  | -0.38389900 | H           |                                        |             |            |             |
| H | -1.37447800 | 3.07624500  | -0.68118700 | 1.13249100                                                                                                                        | 4.75778400  | 0.49365300  | H           |                                        |             |            |             |

|            |             |             |   |   |   |             |             |             |
|------------|-------------|-------------|---|---|---|-------------|-------------|-------------|
| 1.16921000 | 4.33220600  | -1.21149500 | H | - | C | -3.71349600 | -0.68079700 | 1.27073600  |
| 0.01999100 | 5.51840300  | -0.62454600 | N |   | C | -4.39700800 | -1.12021500 | 0.11887800  |
| 1.30654200 | 1.90481400  | 0.14543400  | N |   | H | -4.25661400 | -1.70448600 | -1.95206300 |
| 1.45551600 | 0.63961300  | 0.73131800  | C |   | H | -4.28295000 | -0.45537600 | 2.16852100  |
| 2.61584700 | -0.10437900 | 0.34221900  | C |   | H | -5.47872600 | -1.21121700 | 0.15335200  |
| 3.12345400 | -1.05369900 | 1.22726100  | C |   | C | -1.59871500 | -0.15053600 | 2.55977300  |
| 3.15376200 | 0.05842500  | -0.93160400 | C |   | H | -0.80719100 | -0.86784100 | 2.80253400  |
| 4.19732600 | -1.84597500 | 0.83324100  | H |   | H | -1.12014400 | 0.82518900  | 2.43224000  |
| 2.68066900 | -1.17777100 | 2.21320000  | C |   | H | -2.29204800 | -0.09616500 | 3.40298400  |
| 4.23259100 | -0.73704800 | -1.31077300 | H |   | C | -1.41717400 | -1.32305700 | -2.20541200 |
| 2.73630600 | 0.80248000  | -1.60153600 | C |   | H | -0.28436000 | -1.56074400 | -1.16255900 |
| 4.75523900 | -1.68778600 | -0.43503300 | H |   | H | -1.65173700 | -1.99580900 | -3.02795600 |
| 4.59634400 | -2.58648600 | 1.51887700  | H |   | H | -0.90079800 | -0.40776900 | -2.49989000 |
| 4.66325700 | -0.61362800 | -2.29944400 | H |   | N | -0.30464800 | -1.12958300 | -0.03201900 |
| 5.59312900 | -2.30615100 | -0.74033000 | H |   | N | 0.58521600  | -0.39097600 | 0.49653400  |
| 1.40414300 | 0.72876400  | 1.75054900  | I | - | C | 1.91842400  | -0.83169600 | 0.31779900  |
| 2.23716600 | -2.14133200 | -0.17893300 |   |   | C | 2.93498800  | 0.02910600  | 0.74944400  |
|            |             |             |   |   | C | 2.23971900  | -2.08169400 | -0.22941300 |
|            |             |             |   |   | C | 4.26366500  | -0.34894400 | 0.61224600  |
|            |             |             |   |   | H | 2.66387000  | 0.99367300  | 1.16768600  |
|            |             |             |   |   | C | 3.57632600  | -2.44684300 | -0.36540600 |
|            |             |             |   |   | H | 1.45525600  | -2.77538600 | -0.51363700 |
|            |             |             |   |   | C | 4.58990300  | -1.58454200 | 0.04873500  |
|            |             |             |   |   | H | 5.04889100  | 0.32389800  | 0.94260900  |
|            |             |             |   |   | H | 3.82415100  | -3.41635200 | -0.78706400 |
|            |             |             |   |   | C | -3.72235200 | -1.40903700 | -1.05416500 |
|            |             |             |   |   | C | -2.32999700 | -1.22049200 | -1.08786000 |
|            |             |             |   |   | C | -1.66645900 | -0.89199600 | 0.11676200  |
|            |             |             |   |   | C | -2.33163200 | -0.55462800 | 1.31118000  |

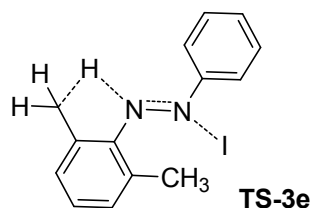

$G_{\text{sol}} = -662.366228$  Hartree

H 5.63001000 -1.87677700 -0.05851400

I 0.19643900 2.12379800 -0.36414400

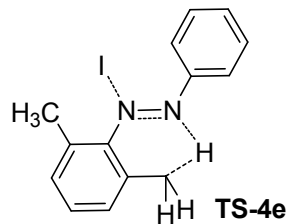

$G_{\text{sol}} = -662.378696$  Hartree

C -3.25243700 1.65106400 -0.97974600

C -1.96182500 1.84977200 -0.41313500

C -1.56548200 0.92934300 0.61589800

C -2.50332900 0.03674700 1.22371600

C -3.77997700 -0.00313700 0.71744400

C -4.13994100 0.77164700 -0.41314900

H -3.54823700 2.27478600 -1.81834900

H -4.51167200 -0.67011700 1.16440400

H -5.14211400 0.68044300 -0.82186900

C -2.06500300 -0.84818900 2.35533700

H -1.30684400 -1.56098900 2.01077100

H -1.61880900 -0.26533900 3.16721000

H -2.91440400 -1.41045400 2.75094700

C -1.05733300 2.82155800 -0.93592100

H 0.14776300 2.12005800 -0.57346600

H -1.29986200 3.23177400 -1.91484000

H -0.64898000 3.55934300 -0.24168700

N -0.24375000 0.66520000 0.84405700

N 0.62162400 1.48430500 0.38203700

C 1.97639900 1.07789100 0.35913100

C 2.83676800 1.74905100 -0.51249900

C 2.45443200 0.07433600 1.20651400

C 4.18327100 1.40430100 -0.54606100

H 2.44218000 2.51903800 -1.16995300

C 3.80550700 -0.25383200 1.16873500

H 1.76847300 -0.43227200 1.87688000

C 4.67119200 0.40313600 0.29450000

H 4.85148100 1.91541300 -1.23226300

H 4.18274700 -1.03257800 1.82437600

H 5.72294900 0.13552700 0.26742500

I 0.03050500 -1.81308100 -0.73050600

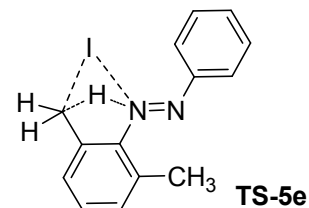

$G_{\text{sol}} = -662.369697$  Hartree

C -3.24046800 2.62609500 -0.47561500

C -1.85390500 2.50421500 -0.48632500

C -1.33346500 1.40645100 0.22235000

C -2.13106500 0.48704200 0.93712800

C -3.52197800 0.62581000 0.87870100

C -4.06146900 1.70021100 0.18473100

H -3.69659900 3.45230500 -1.01445500

H -4.16026300 -0.08558100 1.39384400

H -5.13909600 1.83163400 0.15060600

|   |             |             |             |   |             |             |             |
|---|-------------|-------------|-------------|---|-------------|-------------|-------------|
| C | -1.37187100 | -0.56031200 | 1.62557100  | C | 3.28716300  | 2.13704100  | 0.17413400  |
| H | -0.21841200 | -0.23539300 | 0.73354400  | C | 2.54420100  | -0.17899400 | 0.07550500  |
| H | -0.76045200 | -0.24117800 | 2.47508800  | C | 4.61105600  | 1.71565600  | 0.20067400  |
| H | -1.92504500 | -1.46494100 | 1.86040100  | H | 3.02512000  | 3.19040900  | 0.20002100  |
| C | -0.99094700 | 3.46587500  | -1.25601800 | C | 3.87180000  | -0.58809200 | 0.10086000  |
| H | -0.38400900 | 4.08223100  | -0.58719800 | H | 1.74941200  | -0.91379600 | -0.00705500 |
| H | -0.29443300 | 2.93311800  | -1.91236000 | C | 4.90377100  | 0.35170400  | 0.16653200  |
| H | -1.61569900 | 4.12025500  | -1.86907500 | H | 5.41248000  | 2.44629000  | 0.24658300  |
| N | -0.00791000 | 0.96160600  | 0.22188200  | H | 4.10165100  | -1.64833200 | 0.06039400  |
| N | 0.95938800  | 1.74739000  | 0.12737500  | H | 5.93722000  | 0.01868900  | 0.18381900  |
| C | 2.25482500  | 1.19226900  | 0.12164000  | I | -0.49996400 | -2.59921700 | -0.36185200 |

## 5. Copies of $^1\text{H}$ and $^{13}\text{C}$ NMR Spectra

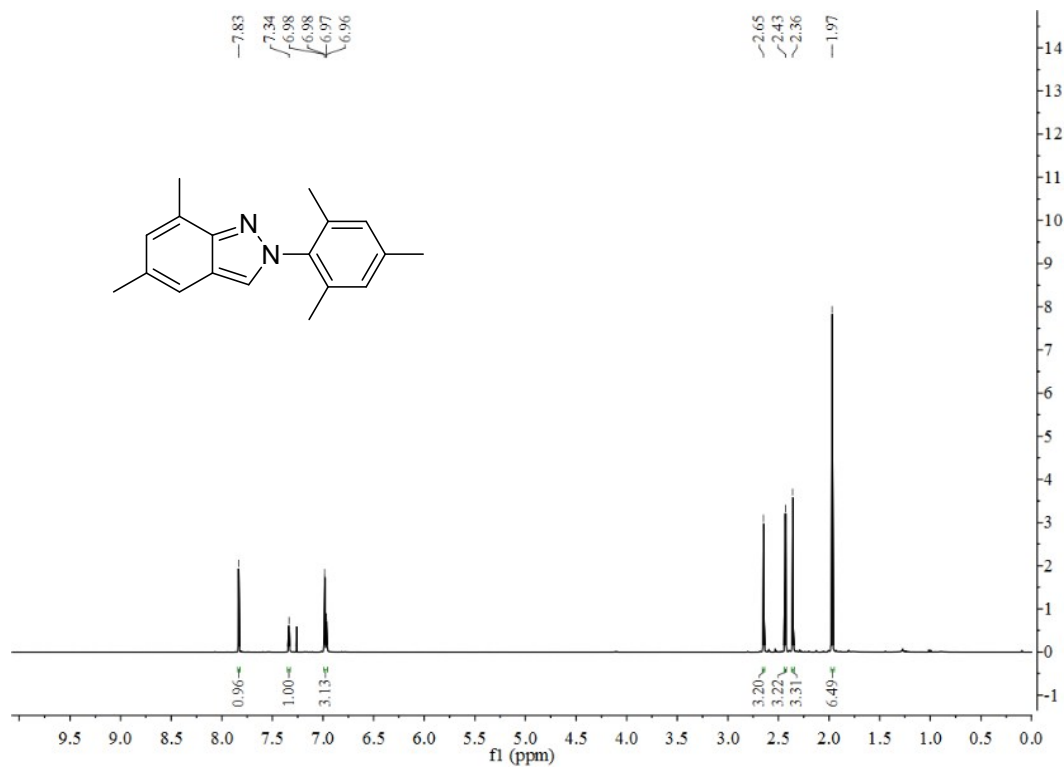

$^1\text{H}$  NMR of Compound **2a**

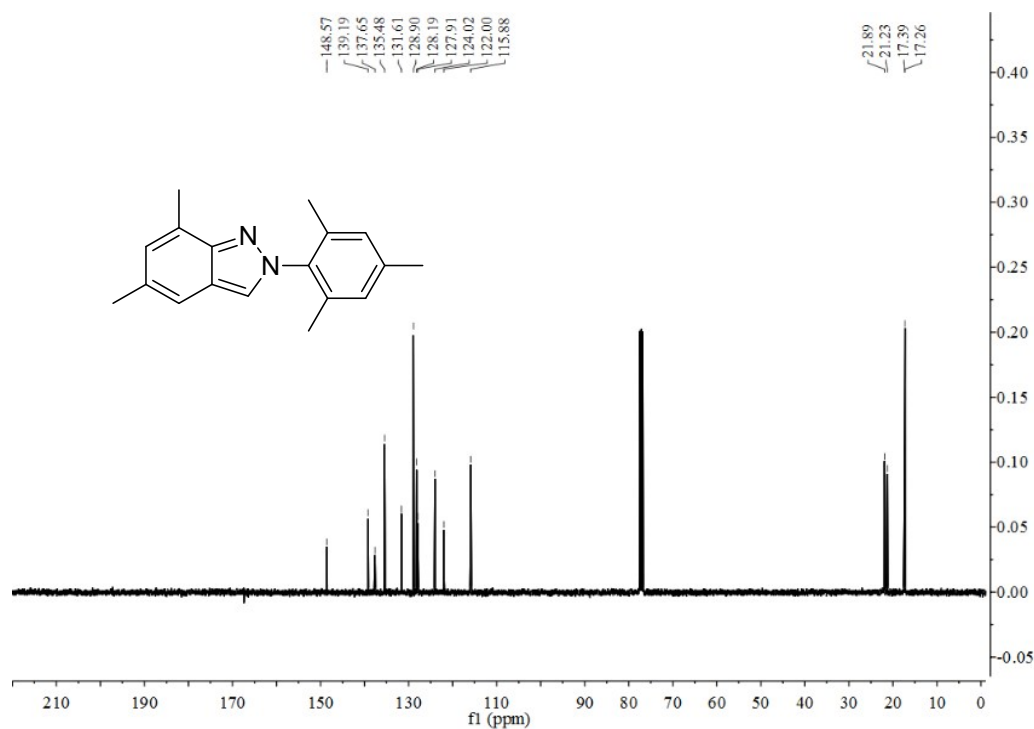

$^{13}\text{C}$  NMR of Compound **2a**

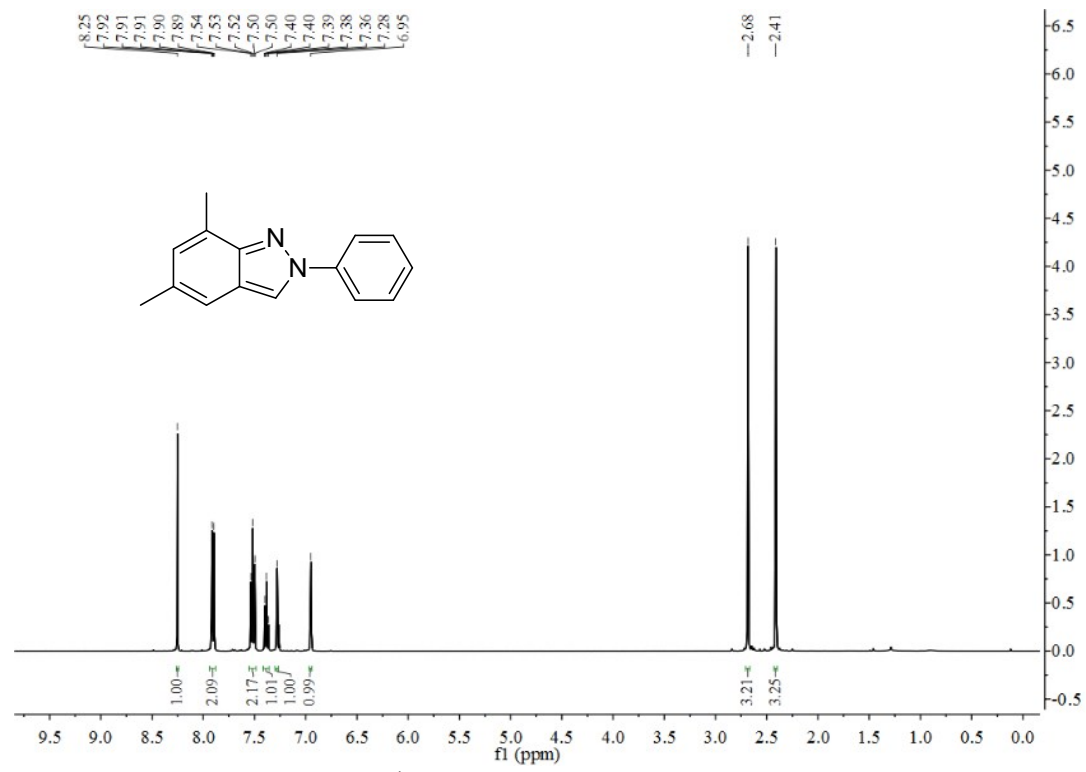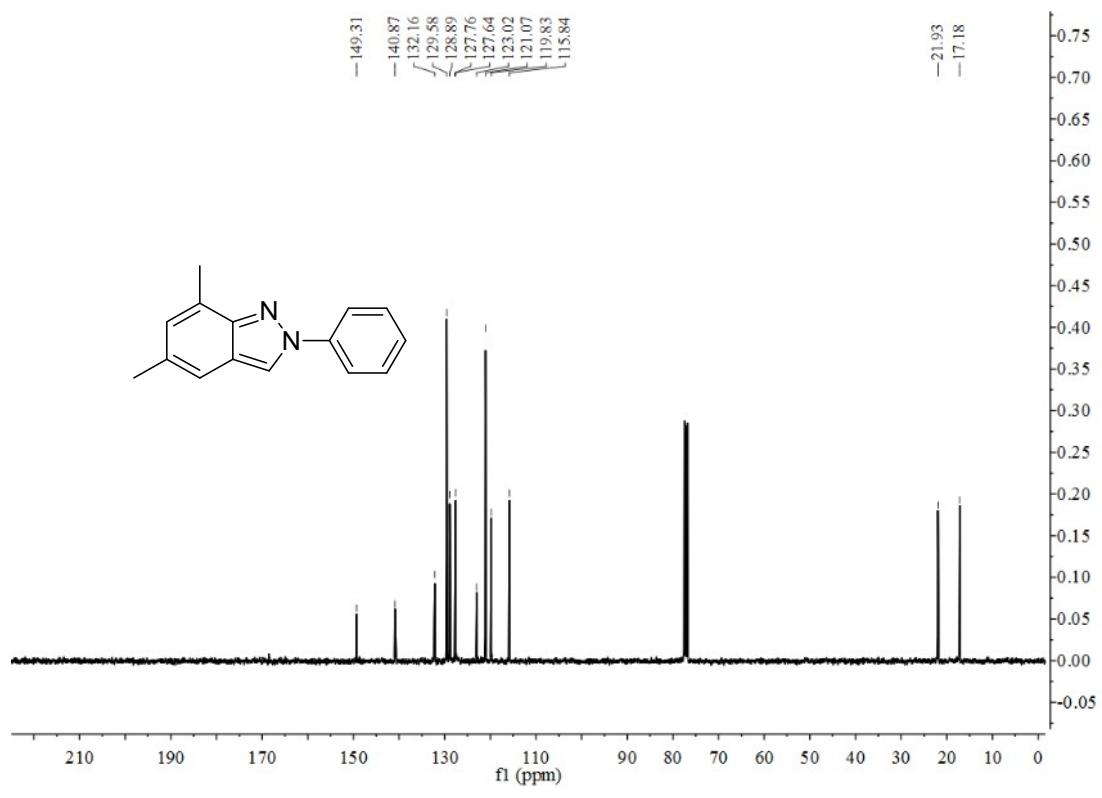

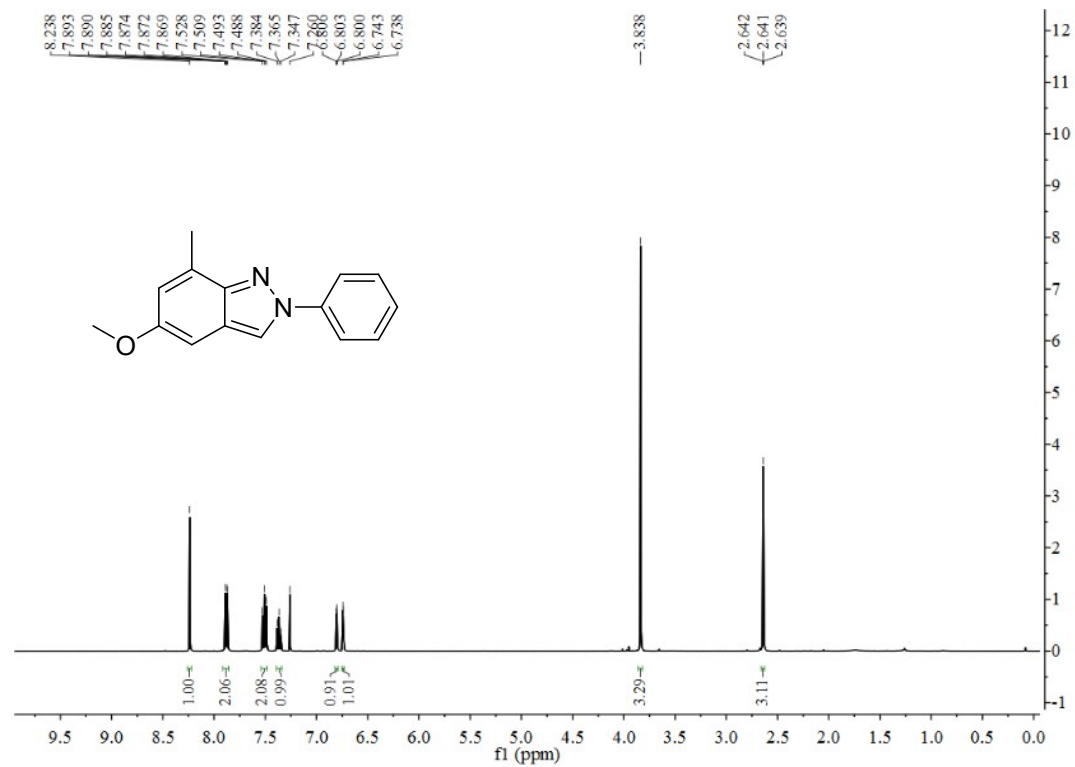

<sup>1</sup>H NMR of Compound 2c

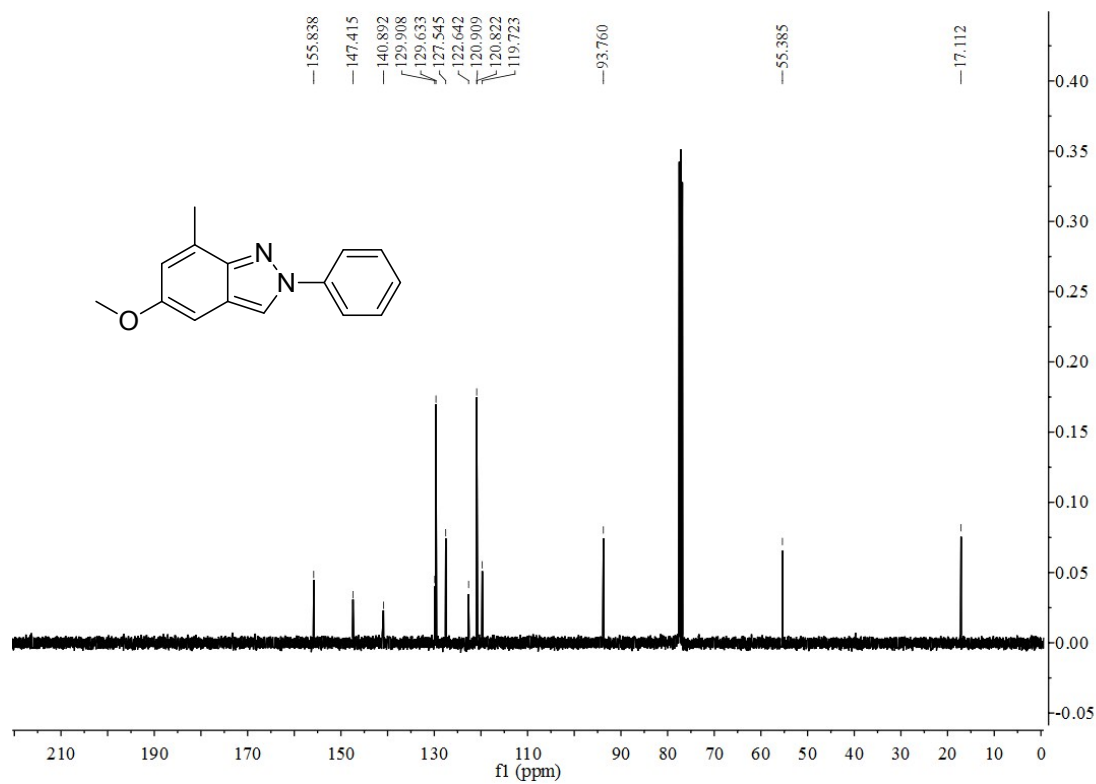

<sup>13</sup>C NMR of Compound 2c



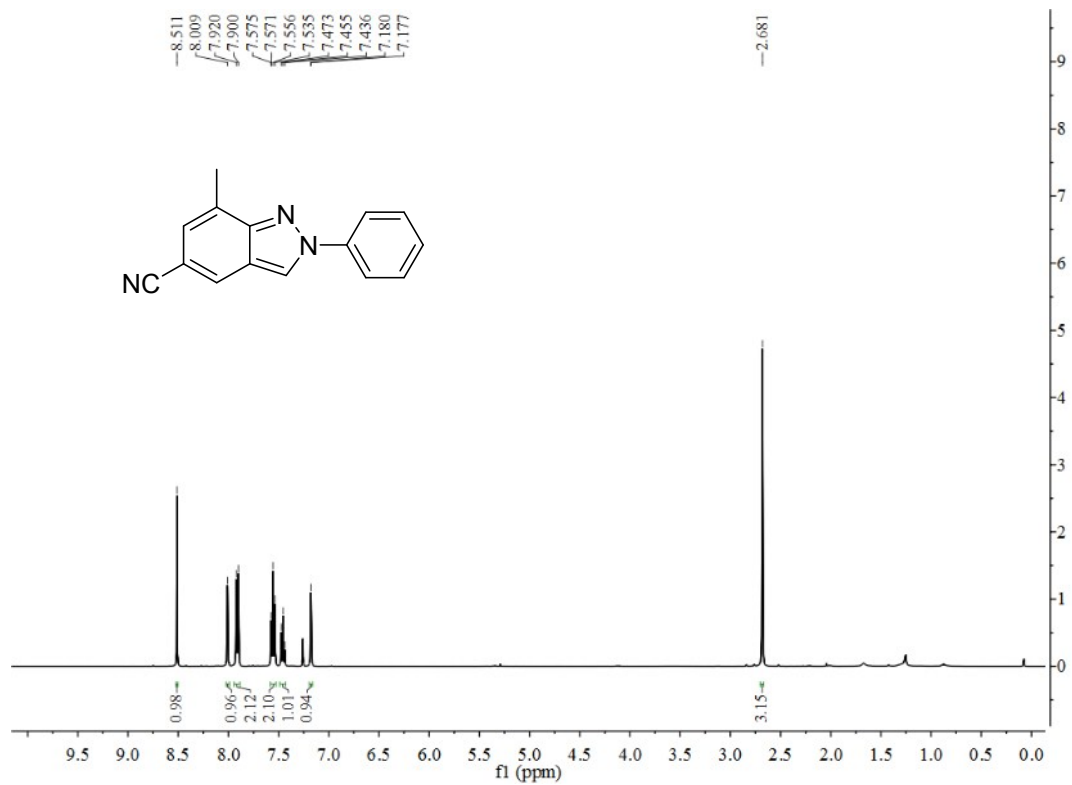

<sup>1</sup>H NMR of Compound 2d

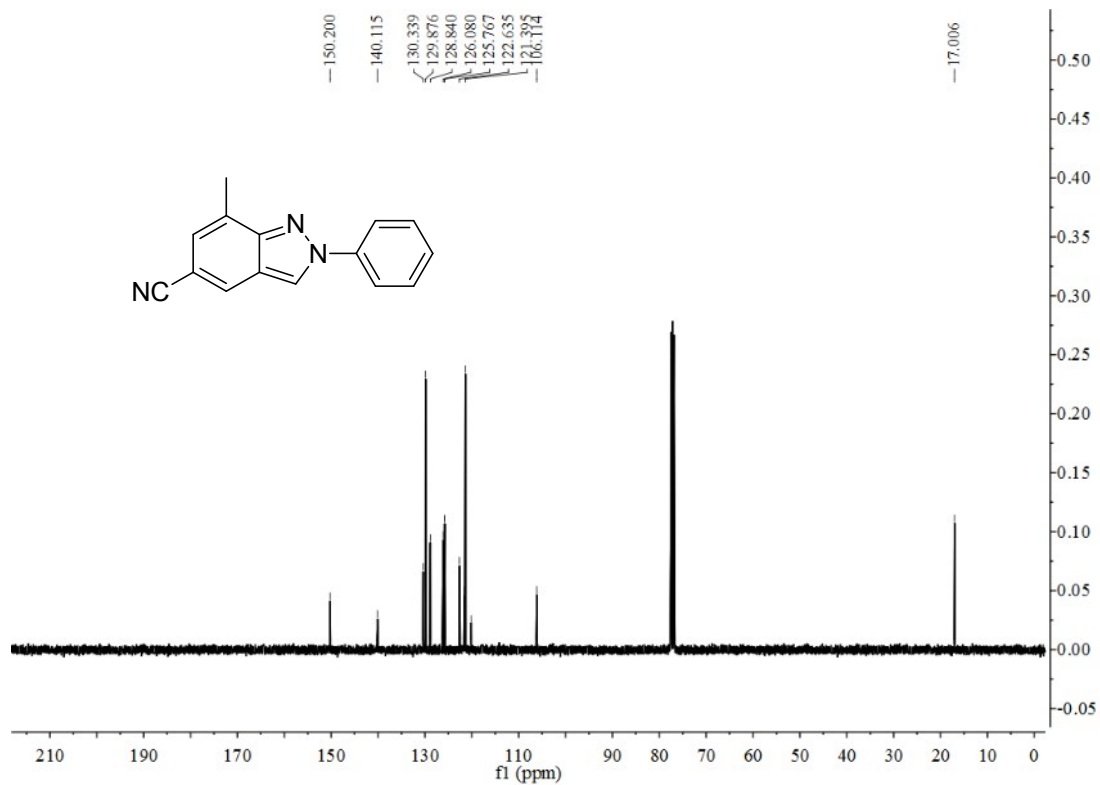

<sup>13</sup>C NMR of Compound d

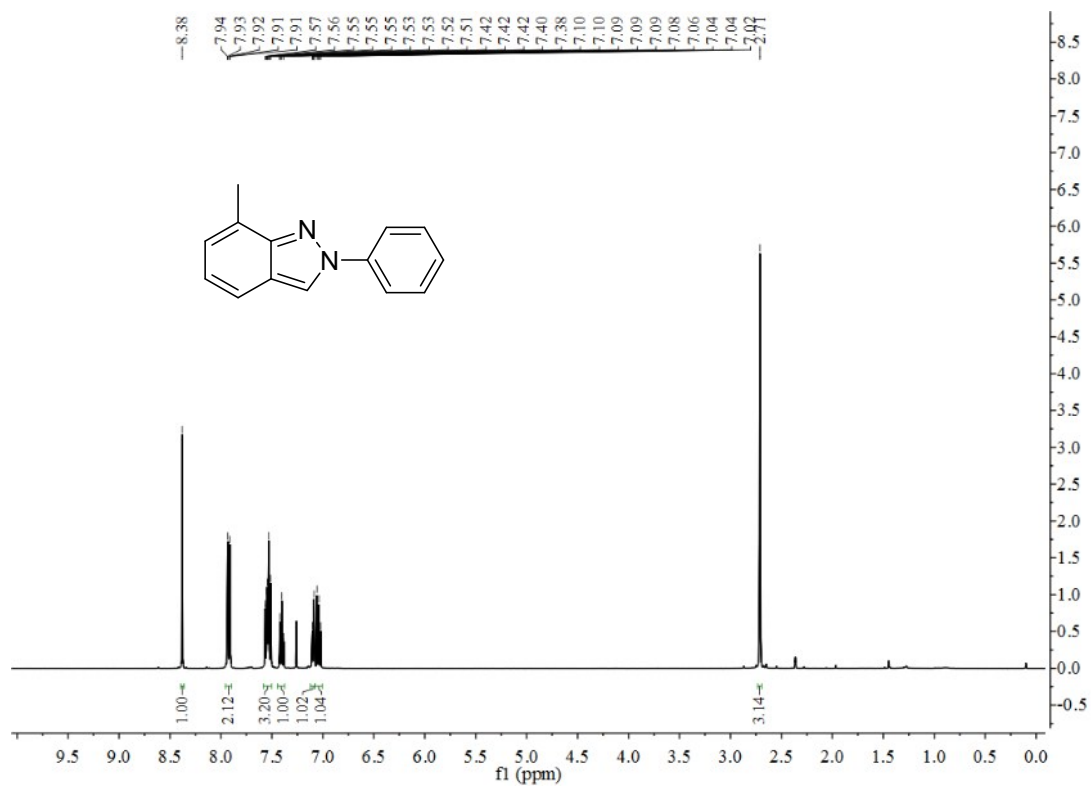

<sup>1</sup>H NMR of Compound 2e

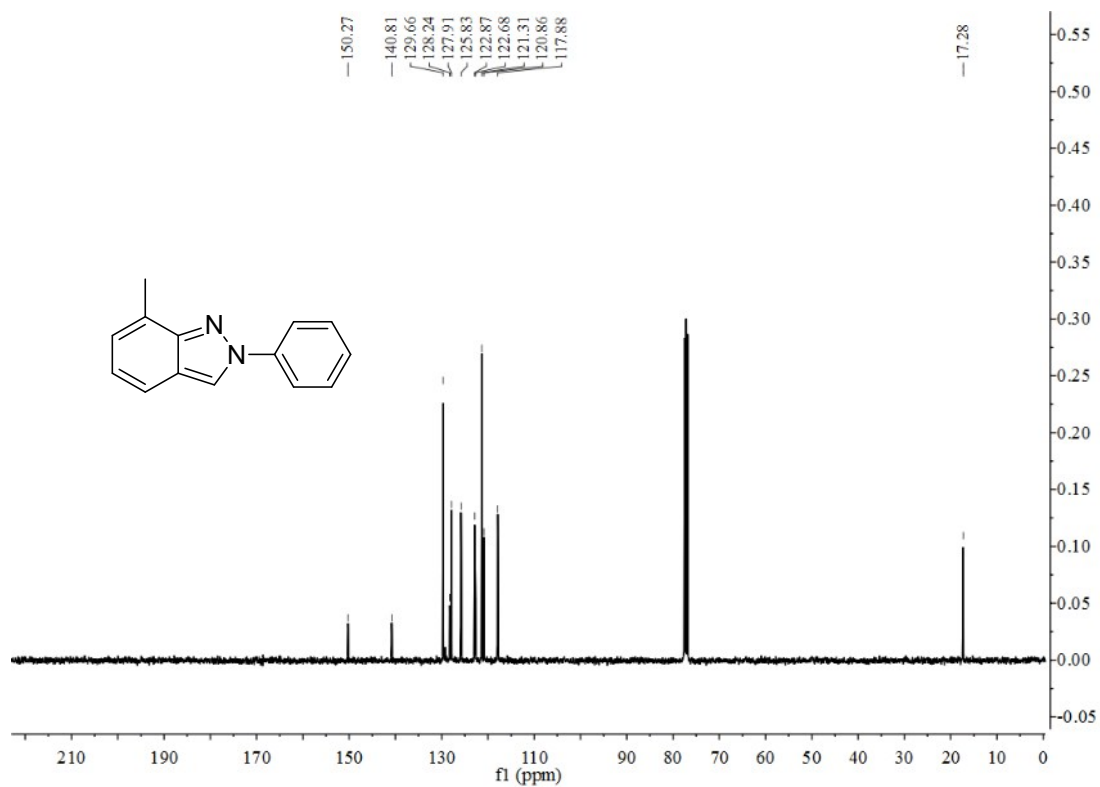

<sup>13</sup>C NMR of Compound 2e

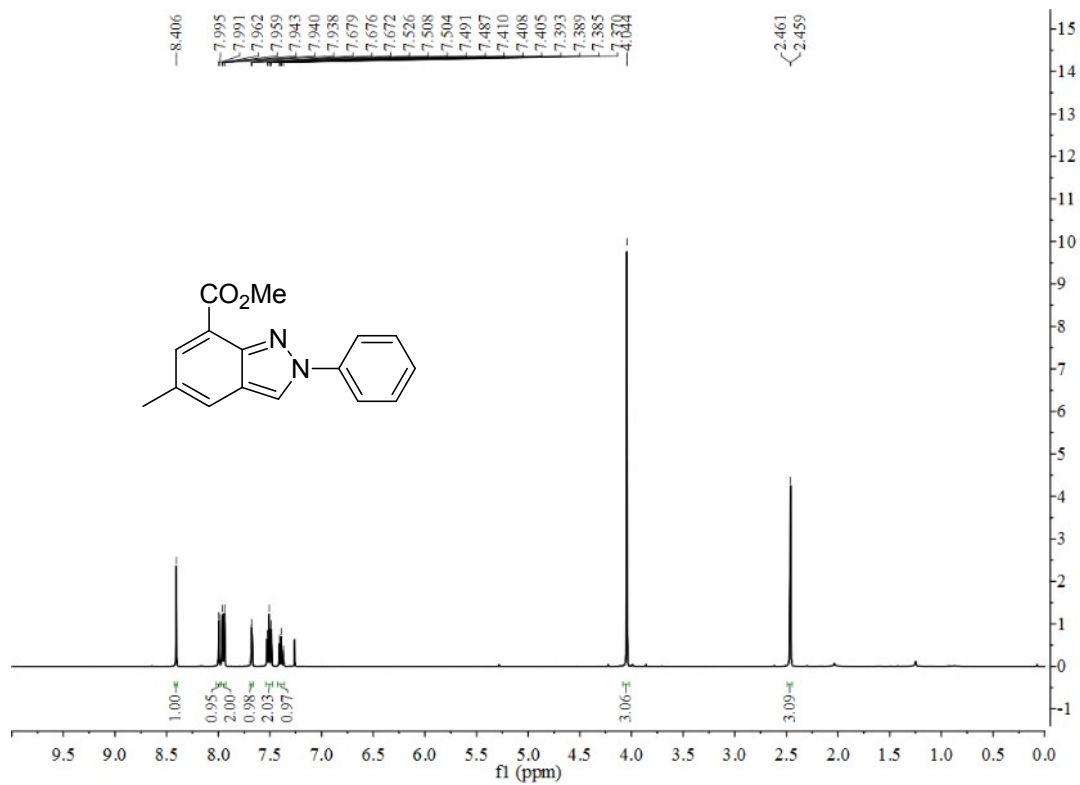

$^1\text{H}$  NMR of Compound 2f

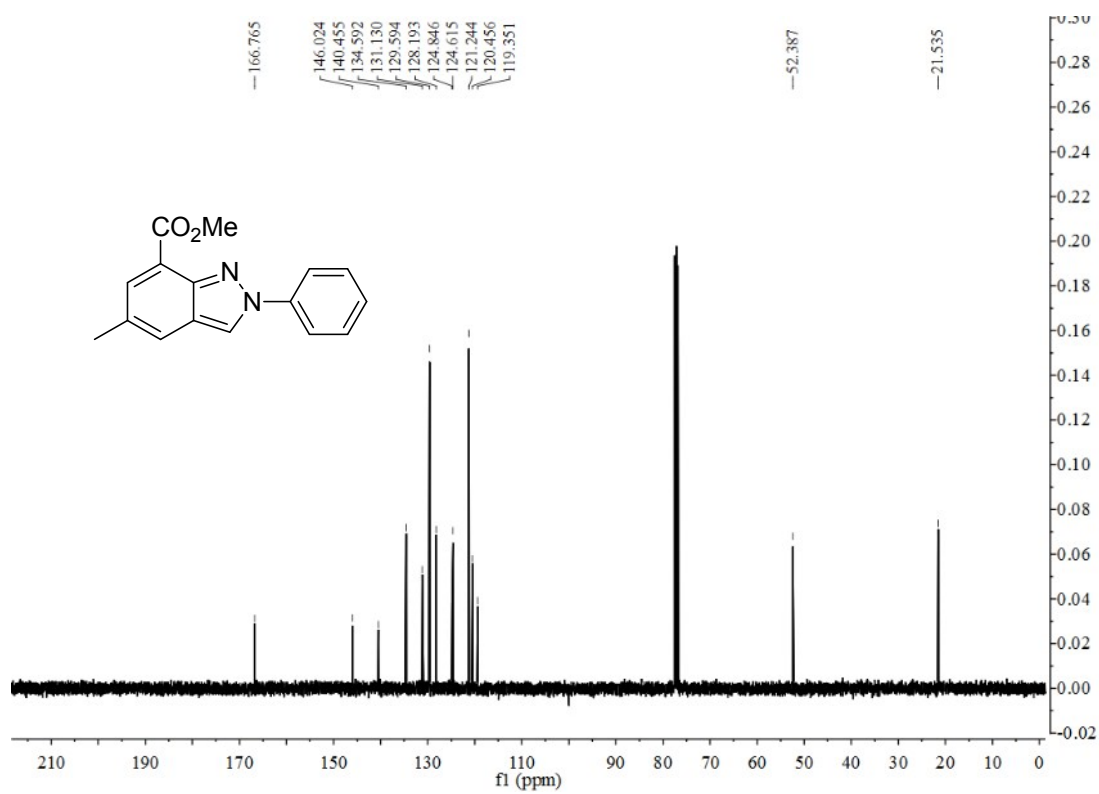

$^{13}\text{C}$  NMR of Compound 2f

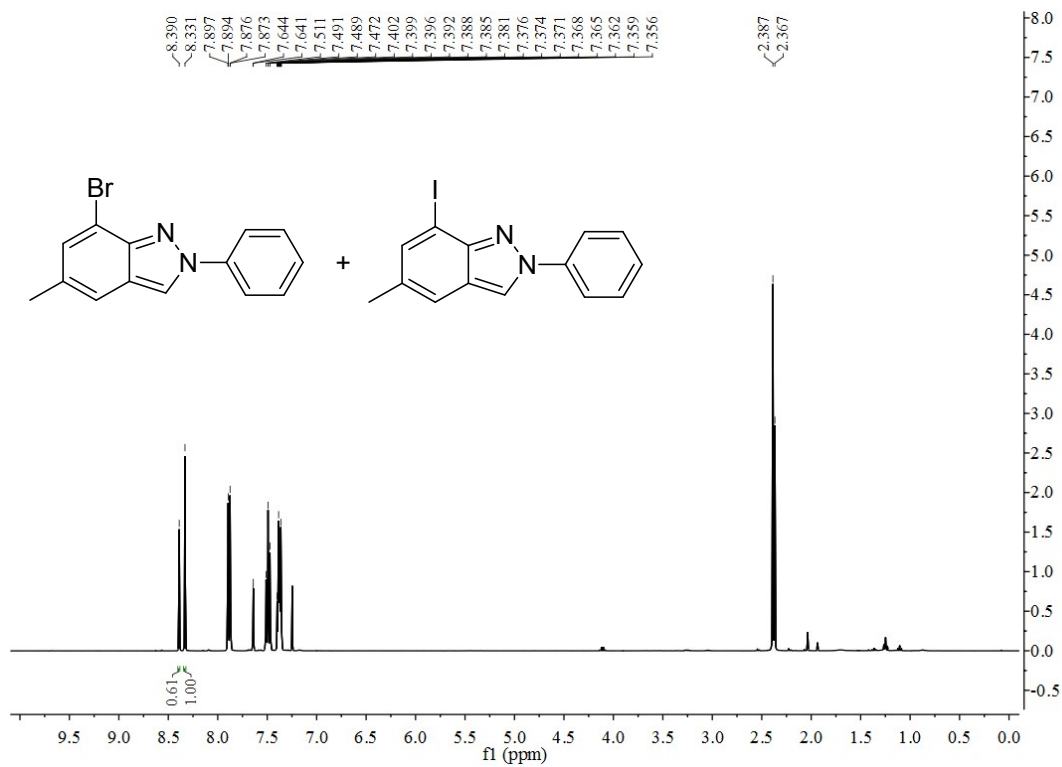

<sup>1</sup>H NMR of Compound **2g+2h (1:0.60)**

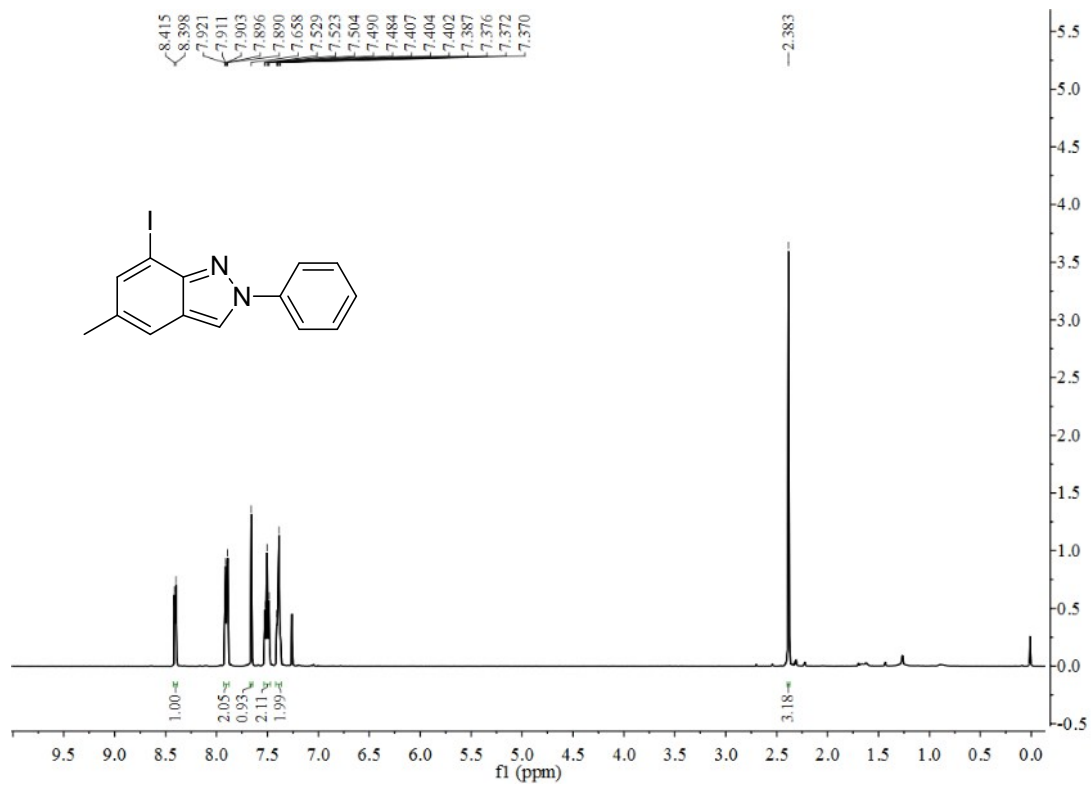

<sup>1</sup>H NMR of Compound 2h

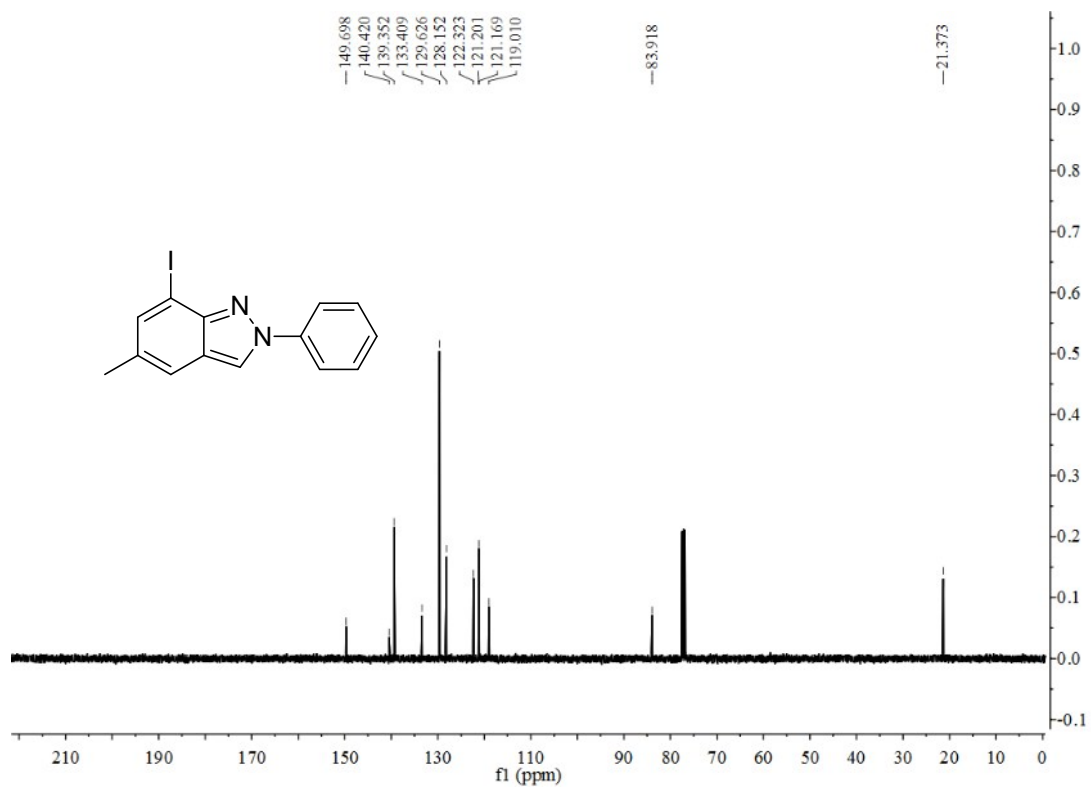

<sup>13</sup>C NMR of Compound 2h

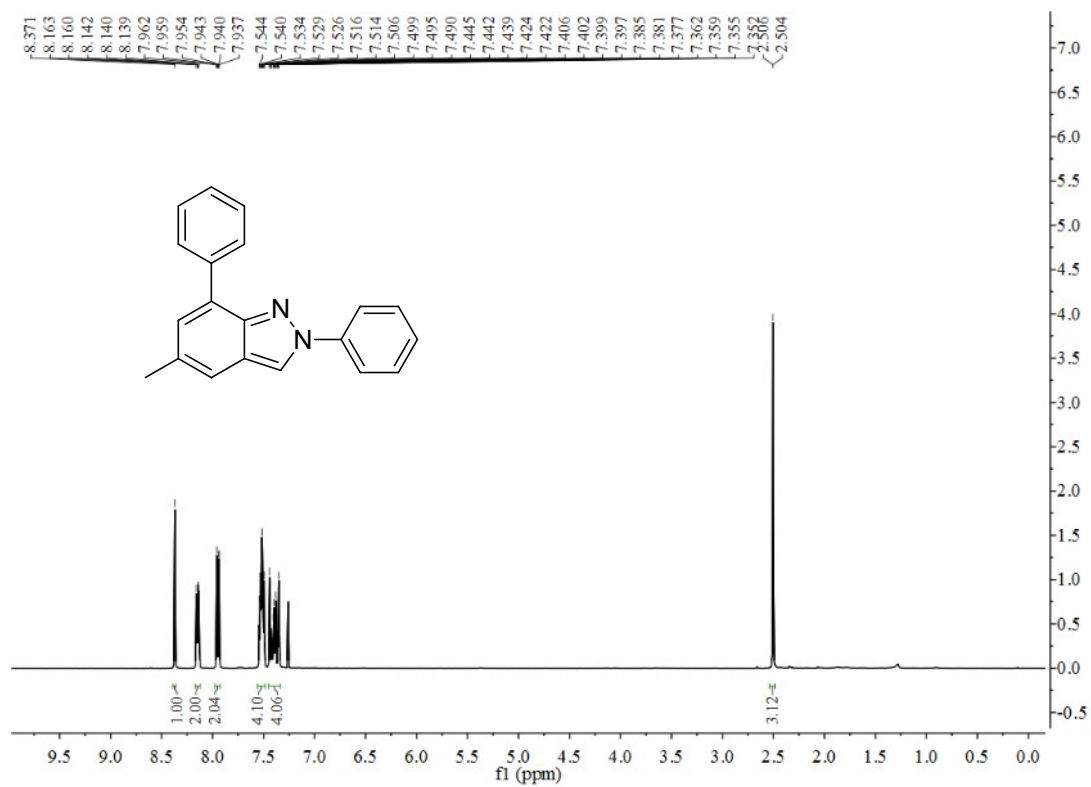

<sup>1</sup>H NMR of Compound 2i

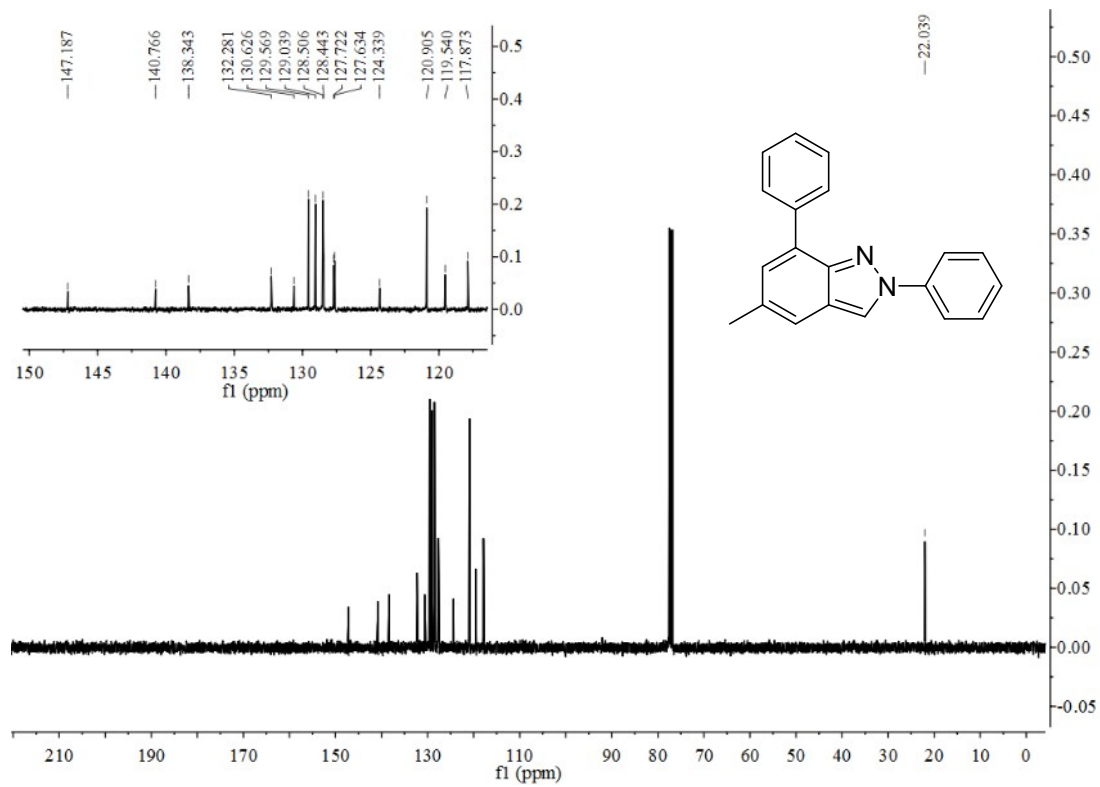

<sup>13</sup>C NMR of Compound 2i

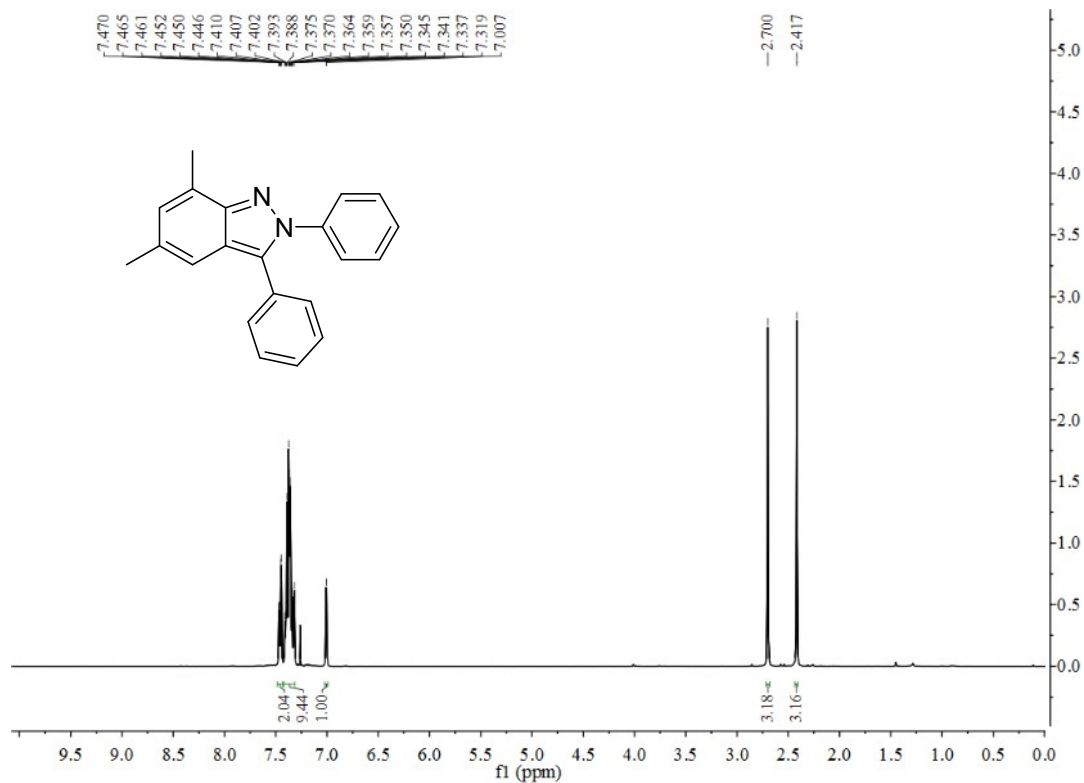

<sup>1</sup>H NMR of Compound 2j

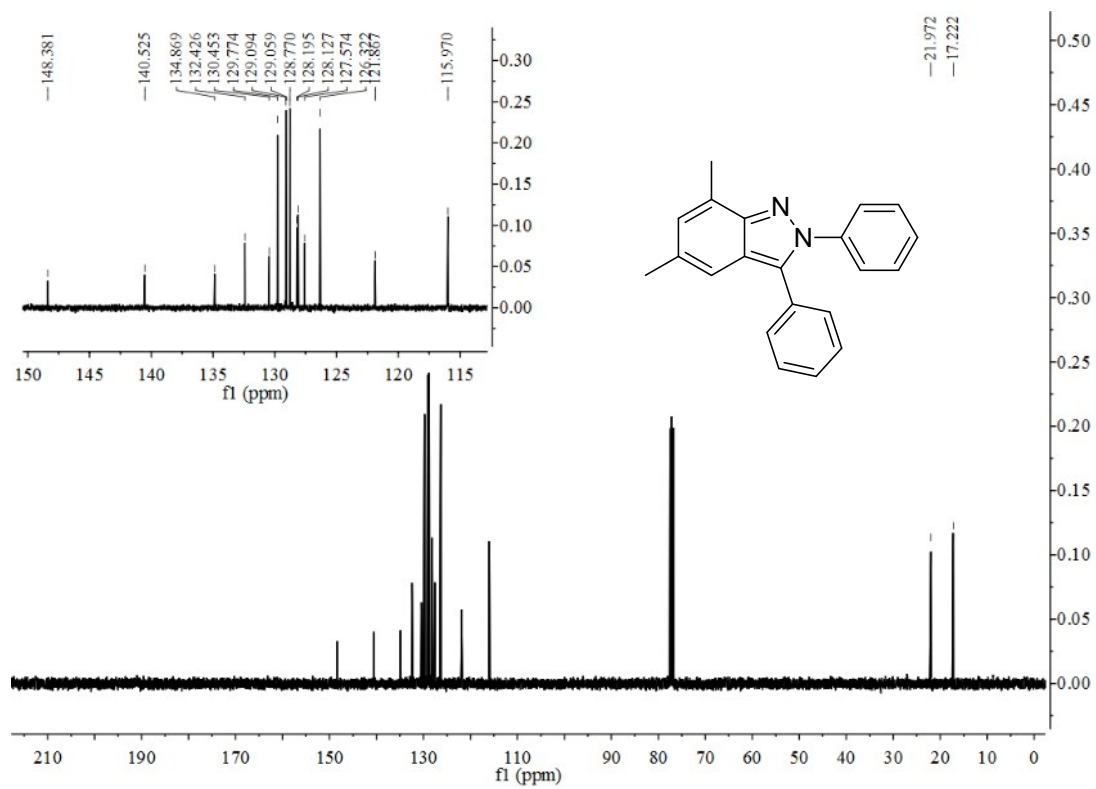

<sup>13</sup>C NMR of Compound 2j

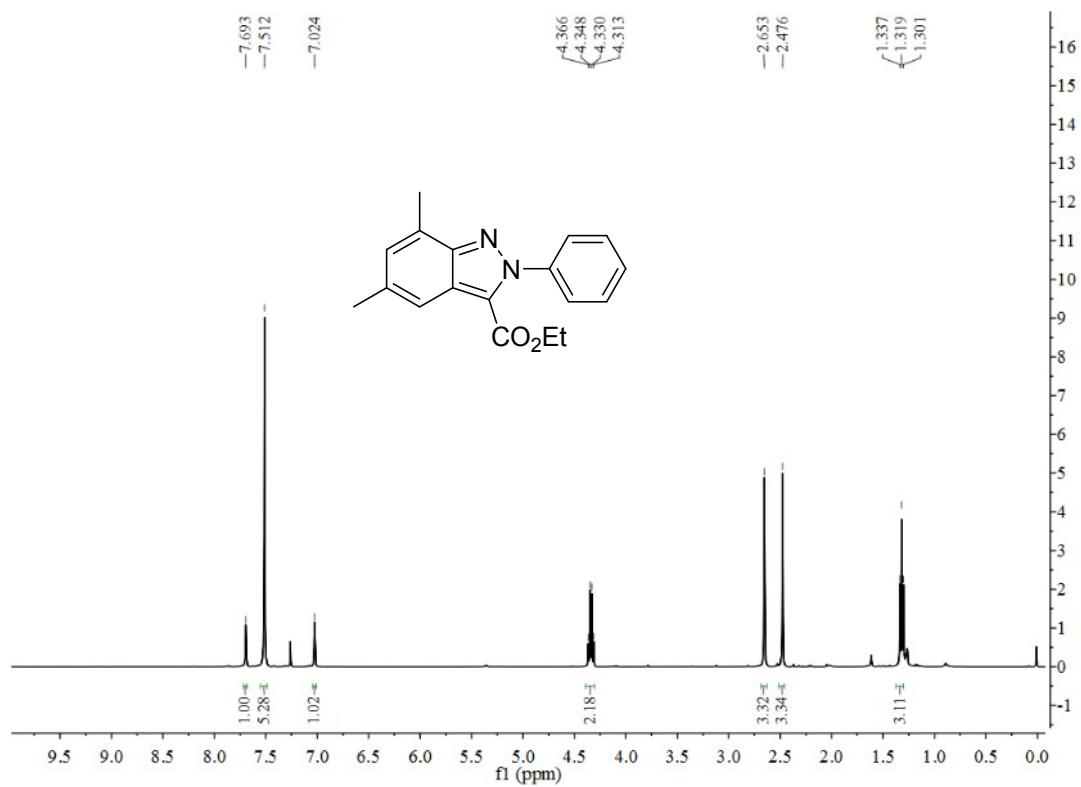

<sup>1</sup>H NMR of Compound 2k

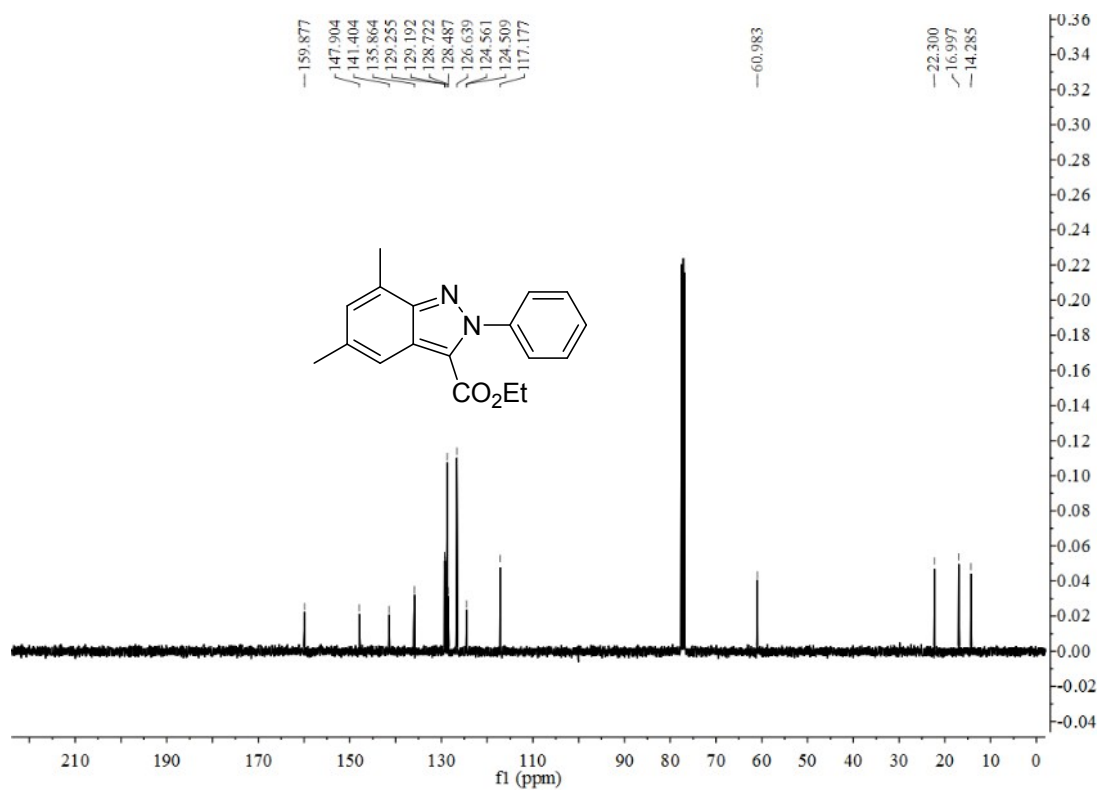

<sup>13</sup>C NMR of Compound 2k



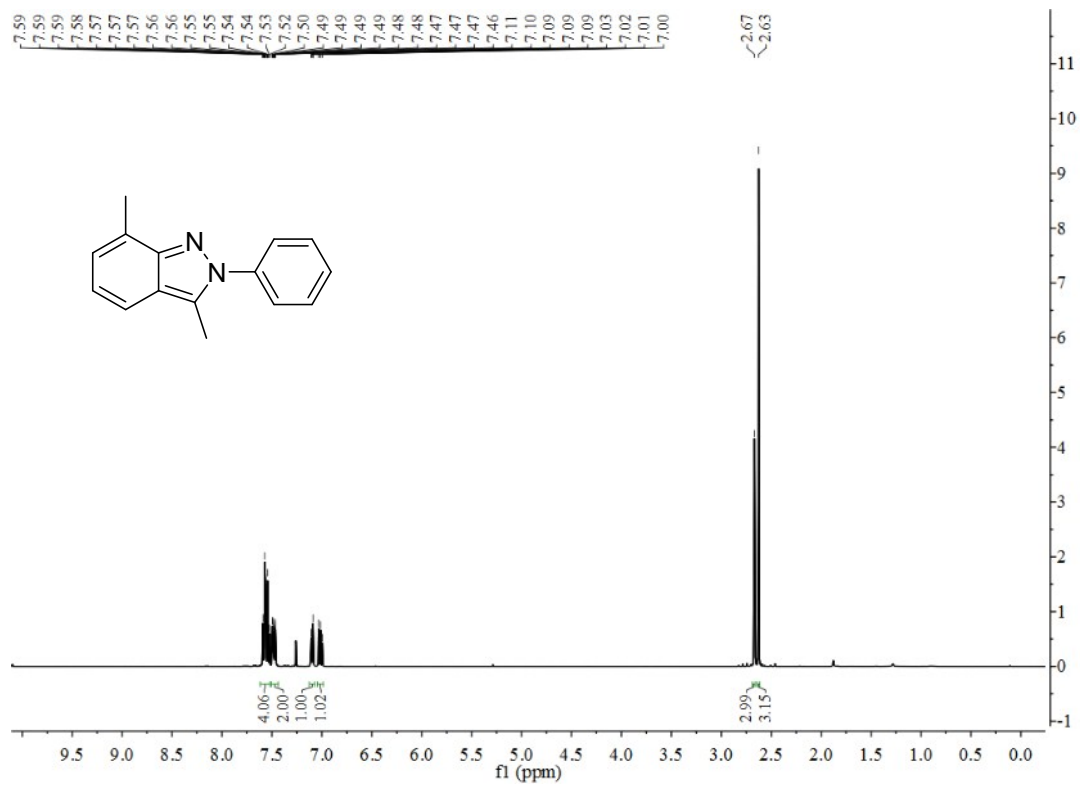

<sup>1</sup>H NMR of Compound 21

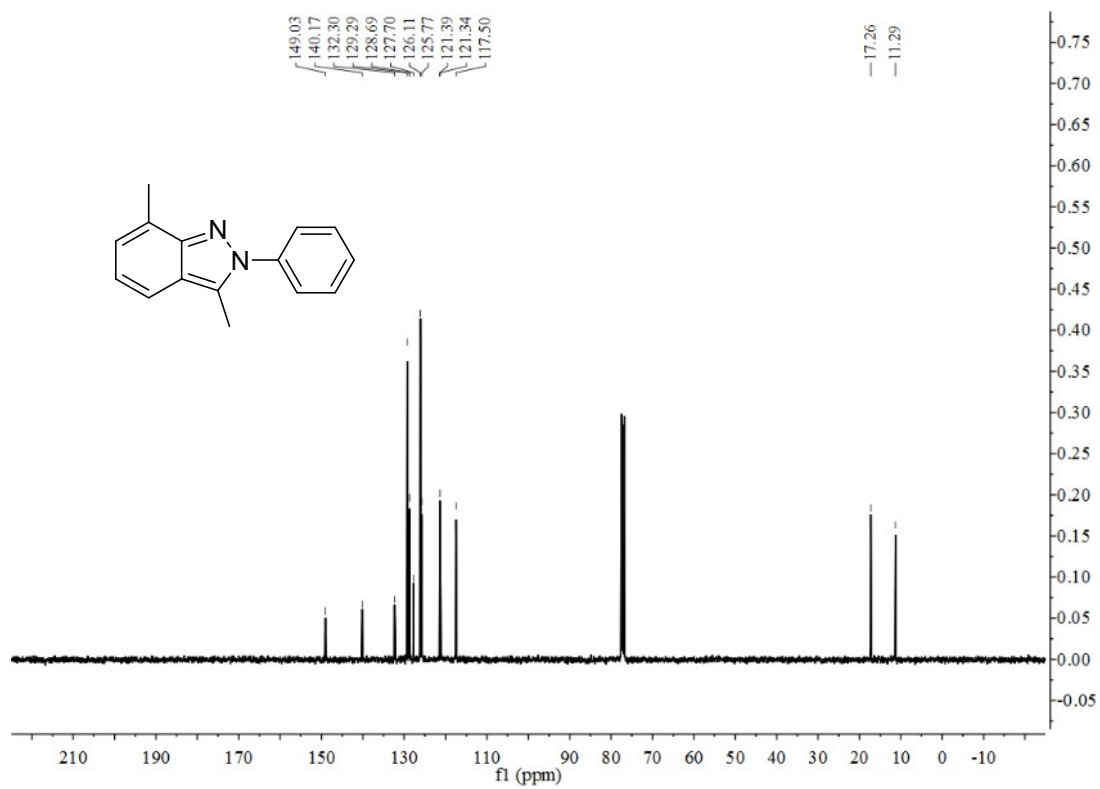

<sup>13</sup>C NMR of Compound 21

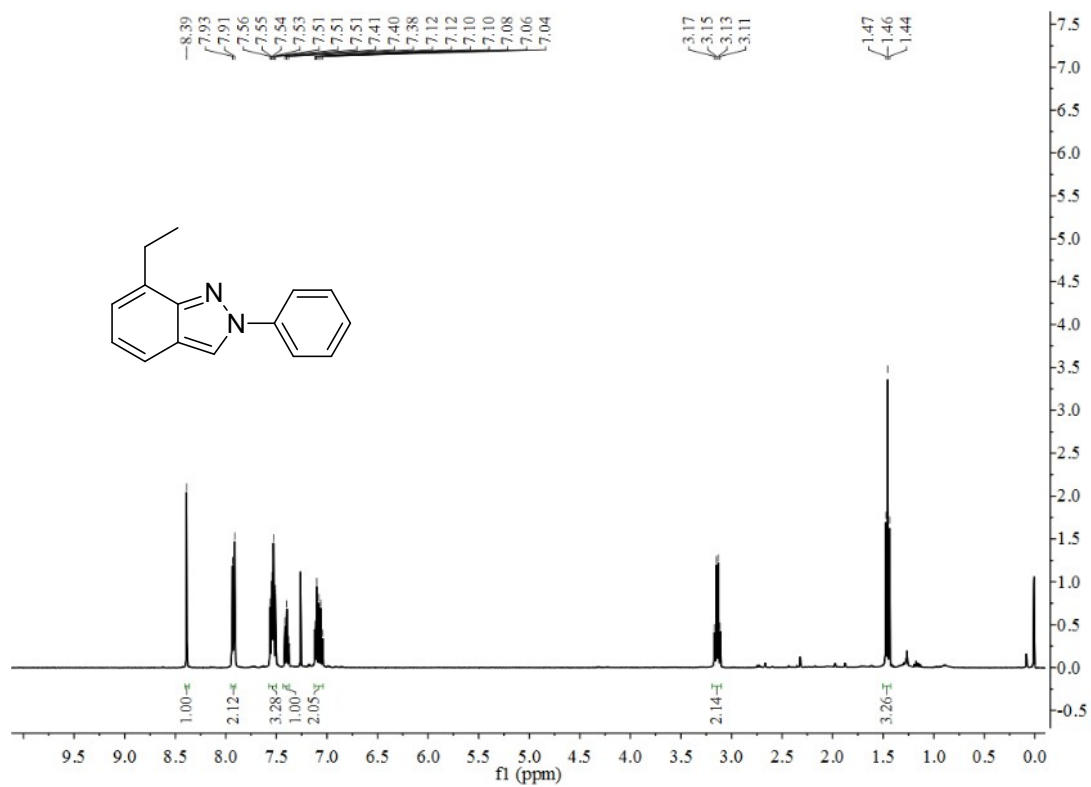

<sup>1</sup>H NMR of Compound 21'

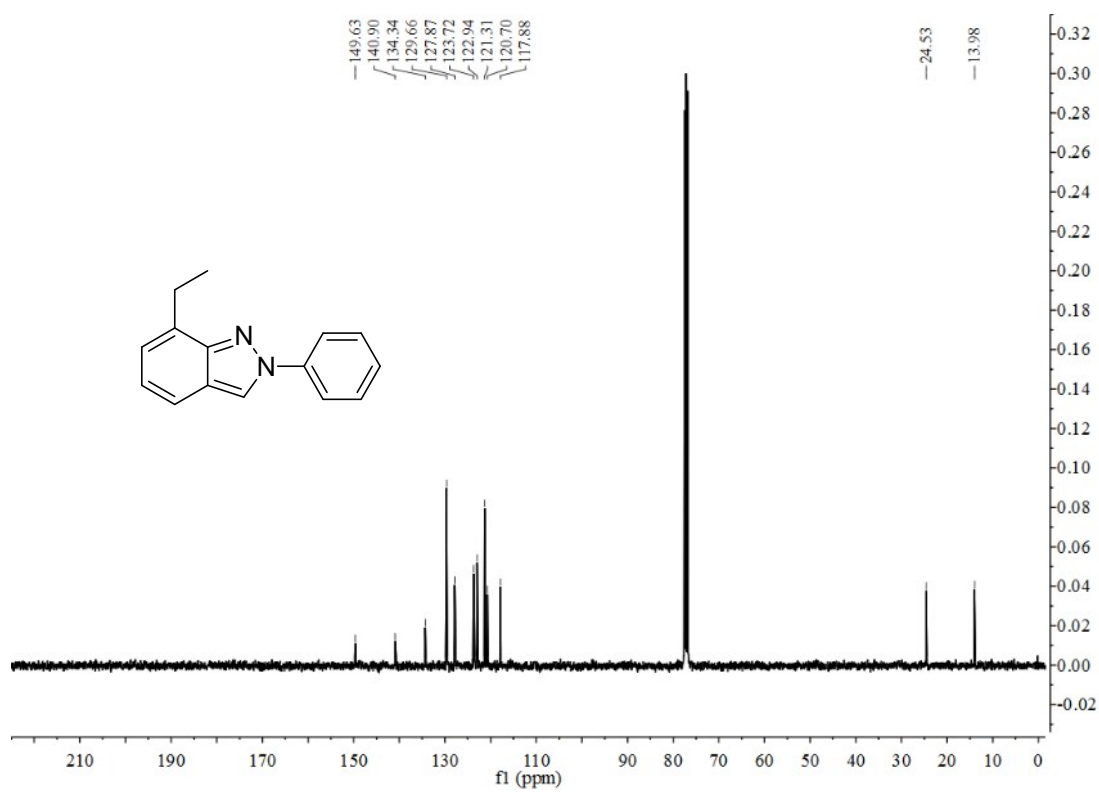

<sup>13</sup>C NMR of Compound 21'

### References:

1. C. L. Forber, E. C. Kelusky, N. J. Bunce and M. C. Zerner, *J. Am. Chem. Soc.*, 1985, **107**, 5884.
2. C. Zhang and N. Jiao, *Angew. Chem. Int. Ed.*, 2010, **49**, 6174.
3. E. Negishi, A. O. King and N. Okukado, *J. Org. Chem.*, 1977, **42**, 1821.
4. T. Hama, S. Ge and J. F. Hartwig, *J. Org. Chem.*, 2013, **78**, 8250.
5. J. Yarwood and W. B. Person, *J. Am. Chem. Soc.*, 1968, **90**, 594.
6. S. J. Tremont and U. R. Hayat, *J. Am. Chem. Soc.*, 1984, **106**, 5759.
7. C. Zhu, Y. Liang, X. Hong, H. Sun, W. Sun, K. N. Houk and Z. Shi, *J. Am. Chem. Soc.*, 2015, **137**, 7564.
